# Supplementary material for: Small RNA Sequencing Reveals Exosomal miRNAs Involved in the Treatment of Asthma by Scorpio and Centipede
Source: Hindawi journal article supplement (doi:10.1155/2020/1061407), 2020-01-01
Supplement: f1 [file 1061407.f1.pdf]

**Supporting information:**

**Table S1** Statistics of the small RNA-seq data.

| SampleName   | TotalReads_Before | TotalBase_Before | TotalReads_After | TotalBase_After | ReadsFilter           | GC%_Before | GC%_After |
|--------------|-------------------|------------------|------------------|-----------------|-----------------------|------------|-----------|
| e            | e                 | e                | r                | r               | %                     | e          | r         |
| xiaochuan1-1 | 21005788          | 3150831317       | 5949406          | 139237445       | 0.2832269851          | 52         | 51        |
| xiaochuan1-2 | 49999154          | 7499789222       | 13814335         | 332209556       | 0.2762913752          | 53         | 51        |
| xiaochuan1-3 | 52447205          | 7866989228       | 14274545         | 343213067       | 0.2721697941          | 53         | 51        |
| zhiliao3-1   | 48740485          | 7310991322       | 16547800         | 397513284       | 0.3395083169          | 55         | 50        |
| zhiliao3-2   | 43724012          | 6558527069       | 14912751         | 355214848       | 0.3410654776          | 53         | 50        |
| zhiliao3-3   | 47743142          | 7161391922       | 16646066         | 396053480       | 0.3486587871          | 55         | 50        |
|              | 263659786         | 39548520080      | 82144903         | 1963441680      | 1.8609207340.2959503  | 321        | 303       |
|              |                   |                  |                  |                 | 0.04419070            |            |           |
| xiaochuan1-1 | 21005788          | 3150831317       | 5949406          | 139237445       | 0.2832269851          | 52         | 51        |
| xiaochuan1-2 | 49999154          | 7499789222       | 13814335         | 332209556       | 0.2762913752          | 53         | 51        |
| xiaochuan1-3 | 52447205          | 7866989228       | 14274545         | 343213067       | 0.2721697940.04362699 | 53         | 51        |

|            |             |            |             |           |                       |            |      |        |
|------------|-------------|------------|-------------|-----------|-----------------------|------------|------|--------|
| 3          |             |            |             |           |                       | 1          |      |        |
|            |             |            |             |           |                       | 0.05437200 |      |        |
| zhiliao3-1 | 48740485    | 7310991322 | 16547800    | 397513284 | 0.3395083169          | 55         | 50   |        |
|            |             |            |             |           |                       | 0.05416076 |      |        |
| zhiliao3-2 | 43724012    | 6558527069 | 14912751    | 355214848 | 0.3410654776          | 53         | 50   |        |
|            |             |            |             |           |                       | 0.05530398 |      |        |
| zhiliao3-3 | 47743142    | 7161391922 | 16646066    | 396053480 | 0.3486587871          | 55         | 50   |        |
|            |             |            |             |           |                       |            |      | #DIV/0 |
|            | 43943297.67 | 6591420013 | 13690817.17 | 327240280 | 0.3101534560.04932505 | 53.5       | 50.5 | !      |

**Table S2** Statistics of the mapped reads.

| #Item            | xiaochuan1-1.miRNA | xiaochuan1-2.miRNA | xiaochuan1-3.miRNA | zhiliao3-1.miRNA | zhiliao3-2.miRNA | zhiliao3-3.miRNA |
|------------------|--------------------|--------------------|--------------------|------------------|------------------|------------------|
| All              | 5949406            | 13814335           | 14274545           | 16547800         | 14912751         | 16646066         |
| UnMapped         | 3530944            | 8592926            | 8935702            | 9847559          | 8773099          | 9817506          |
| Mapped           | 2418462            | 5221409            | 5338843            | 6700241          | 6139652          | 6828560          |
| MappedRate       | 0.407              | 0.378              | 0.374              | 0.405            | 0.412            | 0.41             |
| UniqueMapped     | 2022768            | 4388023            | 4479734            | 5316953          | 4862081          | 5377685          |
| UniqueMappedRate | 0.34               | 0.318              | 0.314              | 0.321            | 0.326            | 0.323            |
| RepeatMapped     | 395694             | 833386             | 859109             | 1383288          | 1277571          | 1450875          |
| AllBase          | 139240287          | 332215819          | 343219844          | 397520703        | 355221681        | 396060770        |
| UnMappedBase     | 87062153           | 219660031          | 228194796          | 252506021        | 222441146        | 248474344        |
| MappedBase       | 52178134           | 112555788          | 115025048          | 145014682        | 132780535        | 147586426        |
| UniqueMappedBase | 43538937           | 94340535           | 96230413           | 114868897        | 104936553        | 116049333        |
| RepeatMappedBase | 8639197            | 18215253           | 18794635           | 30145785         | 27843982         | 31537093         |

**Table S3** Target gene analysis for miR-147, miR-98-5p and miR-10a.

| QueryID        | SubjectID | OverlapInfo       | Energy_Miranda | Score_Miranda | StartSubject_Miranda | EndSubject_Miranda | Energy_RNAhybrid | P-Value_RNAhybrid | StartSubject_RNAhybrid | EndSubject_RNAhybrid | AccessionID    | Symbol | GeneType | Location                 | Strand | KeggID     | Description                                            |
|----------------|-----------|-------------------|----------------|---------------|----------------------|--------------------|------------------|-------------------|------------------------|----------------------|----------------|--------|----------|--------------------------|--------|------------|--------------------------------------------------------|
| mmu-miR-147-3p | Pax5      | Miranda_RNAhybrid | -23.77         | 157           | 2248                 | 2269               | -29.1            | 0.528892          | 2248                   | 2270                 | NM_008782.2    | Pax5   | mRNA     | chr4:44531506-44710440   | -      | mmu:18507  | Paired box protein Pax-5                               |
| mmu-miR-147-3p | Kcnq4     | Miranda_RNAhybrid | -25.16         | 157           | 847                  | 867                | -30.3            | 0.11836           | 850                    | 868                  | NM_001081142.1 | Kcnq4  | mRNA     | chr4:120696134-120747491 | -      | mmu:60613  | Potassium voltage-gated channel subfamily KQT member 4 |
| mmu-miR-147-3p | Kpnab6    | Miranda_RNAhybrid | -22.47         | 155           | 88                   | 109                | -29.3            | 0.407137          | 79                     | 110                  | NM_008468.4    | Kpnab6 | mRNA     | chr4:129643985-129662500 | -      | mmu:16650  | Importin subunit alpha-7                               |
| mmu-miR-147-3p | Eif4g3    | Miranda_RNAhybrid | -21.84         | 155           | 476                  | 494                | -25.4            | 0.426623          | 478                    | 495                  | NM_0172703.3   | Eif4g3 | mRNA     | chr4:137993013-1382064   | +      | mmu:230861 | Eukaryotic translation initiation                      |

|                            |             |                               |            |     |      |      |       |              |      |      |                            |             |              |                                      |   |                    |                                                          |
|----------------------------|-------------|-------------------------------|------------|-----|------|------|-------|--------------|------|------|----------------------------|-------------|--------------|--------------------------------------|---|--------------------|----------------------------------------------------------|
| -3p                        |             | brid                          |            |     |      |      |       |              |      |      |                            |             |              | 47                                   |   |                    | factor 4<br>gamma 3                                      |
| mmu<br>-miR<br>-147<br>-3p | Sh2<br>d5   | Miran<br>da_R<br>NAhy<br>brid | -25.<br>13 | 167 | 1481 | 1502 | -27.3 | 0.380<br>039 | 1483 | 1503 | NM_<br>0010<br>9963<br>1.1 | Sh2<br>d5   | m<br>RN<br>A | chr4:138<br>250411-<br>1382609<br>68 | + | mmu<br>:230<br>863 | SH2<br>domain-con<br>taining<br>protein 5                |
| mmu<br>-miR<br>-147<br>-3p | Nduf<br>a4  | Miran<br>da_R<br>NAhy<br>brid | -26.<br>74 | 165 | 40   | 60   | -29.6 | 0.003<br>384 | 42   | 60   | NM_<br>0108<br>86.2        | Nduf<br>a4  | m<br>RN<br>A | chr6:119<br>00373-1<br>1907446       | - | mmu<br>:179<br>92  | Cytochrome<br>c oxidase<br>subunit<br>NDUFA4             |
| mmu<br>-miR<br>-147<br>-3p | Ppp<br>1r17 | Miran<br>da_R<br>NAhy<br>brid | -20.<br>27 | 159 | 1110 | 1131 | -29.6 | 0.091<br>765 | 1002 | 1032 | NM_<br>0111<br>53.3        | Ppp<br>1r17 | m<br>RN<br>A | chr6:560<br>17515-5<br>6032688       | + | mmu<br>:190<br>51  | Protein<br>phosphatas<br>e 1<br>regulatory<br>subunit 17 |
| mmu<br>-miR<br>-147<br>-3p | Fbxl<br>14  | Miran<br>da_R<br>NAhy<br>brid | -24        | 153 | 38   | 64   | -26.9 | 0.633<br>167 | 40   | 65   | NM_<br>1339<br>40.3        | Fbxl<br>14  | m<br>RN<br>A | chr6:119<br>479668-<br>1194838<br>86 | + | mmu<br>:101<br>358 | F-box/LRR-r<br>peat<br>protein 14                        |
| mmu<br>-miR<br>-147<br>-3p | Hus<br>1    | Miran<br>da_R<br>NAhy<br>brid | -21.<br>61 | 163 | 70   | 91   | -26.7 | 0.765<br>537 | 64   | 92   | NM_<br>0083<br>16.4        | Hus<br>1    | m<br>RN<br>A | chr11:89<br>93137-9<br>011191        | - | mmu<br>:155<br>74  | Checkpoint<br>protein<br>HUS1                            |
| mmu<br>-miR<br>-147        | lba5<br>7   | Miran<br>da_R<br>NAhy         | -21.<br>74 | 154 | 2651 | 2672 | -27.5 | 0.547<br>648 | 2647 | 2673 | NM_<br>1831<br>10.1        | lba5<br>7   | m<br>RN<br>A | chr11:59<br>155369-<br>5916374       | - | mmu<br>:216<br>792 | Putative<br>transferase<br>CAF17                         |

|                            |            |                               |            |     |      |      |       |              |      |      |                            |            |                     |                                       |   |                    |                                                                             |
|----------------------------|------------|-------------------------------|------------|-----|------|------|-------|--------------|------|------|----------------------------|------------|---------------------|---------------------------------------|---|--------------------|-----------------------------------------------------------------------------|
| -3p                        |            | brid                          |            |     |      |      |       |              |      |      |                            |            |                     | 5                                     |   |                    | homolog,<br>mitochondri<br>al                                               |
| mmu<br>-miR<br>-147<br>-3p | Zzef<br>1  | Miran<br>da_R<br>NAhy<br>brid | -25.<br>65 | 162 | 569  | 589  | -30.8 | 0.139<br>223 | 570  | 590  | NM_<br>0010<br>4553<br>6.2 | Zzef<br>1  | m<br>RN<br>A        | chr11:72<br>796226-<br>7292712<br>0   | + | mmu<br>:195<br>018 | Zinc finger<br>ZZ-type and<br>EF-hand<br>domain-con<br>taining<br>protein 1 |
| mmu<br>-miR<br>-147<br>-3p | Enth<br>d2 | Miran<br>da_R<br>NAhy<br>brid | -28.<br>81 | 173 | 289  | 309  | -30   | 0.064<br>411 | 291  | 310  | NM_<br>1831<br>37.2        | Enth<br>d2 | m<br>RN<br>A        | chr11:12<br>0090522<br>-120098<br>695 | - | mmu<br>:787<br>77  | AP-4<br>complex<br>accessory<br>subunit<br>tepsin                           |
| mmu<br>-miR<br>-147<br>-3p | Tspy<br>l4 | Miran<br>da_R<br>NAhy<br>brid | -22.<br>7  | 156 | 2251 | 2273 | -28   | 0.430<br>284 | 2241 | 2273 | NM_<br>0302<br>03.2        | Tspy<br>l4 | m<br>RN<br>A        | chr10:34<br>297421-<br>3430132<br>0   | + | mmu<br>:724<br>80  | Putative<br>uncharacteri<br>zed protein                                     |
| mmu<br>-miR<br>-147<br>-3p | Ncln       | Miran<br>da_R<br>NAhy<br>brid | -23.<br>38 | 150 | 135  | 155  | -26.2 | 0.370<br>782 | 138  | 156  | NM_<br>1340<br>09.3        | Ncln       | m<br>RN<br>A        | chr10:81<br>486455-<br>8149669<br>1   | - | mmu<br>:103<br>425 | Nicalin                                                                     |
| mmu<br>-miR<br>-147<br>-3p | Atp2<br>b1 | Miran<br>da_R<br>NAhy<br>brid | -21.<br>69 | 152 | 91   | 112  | -25.8 | 0.849<br>202 | 87   | 113  | NM_<br>0264<br>82.2        | Atp2<br>b1 | mi<br>sc<br>RN<br>A | chr10:98<br>914359-<br>9902329<br>5   | + | mmu<br>:679<br>72  | Plasma<br>membrane<br>calcium-tra<br>nsporting                              |

|                            |            |                               |            |     |      |      |       |              |      |      |                            |            |              |                                      |   |                    |                                                           |
|----------------------------|------------|-------------------------------|------------|-----|------|------|-------|--------------|------|------|----------------------------|------------|--------------|--------------------------------------|---|--------------------|-----------------------------------------------------------|
|                            |            |                               |            |     |      |      |       |              |      |      |                            |            |              |                                      |   |                    | ATPase 1                                                  |
| mmu<br>-miR<br>-147<br>-3p | Cerk       | Miran<br>da_R<br>NAhy<br>brid | -22.<br>74 | 150 | 548  | 570  | -28.1 | 0.398<br>344 | 551  | 570  | NM_<br>1454<br>75.4        | Cerk       | m<br>RN<br>A | chr15:86<br>139129-<br>8618633<br>6  | - | mmu<br>:223<br>753 | Ceramide<br>kinase                                        |
| mmu<br>-miR<br>-147<br>-3p | Gxylt<br>1 | Miran<br>da_R<br>NAhy<br>brid | -20.<br>04 | 151 | 2629 | 2650 | -26.8 | 0.856<br>991 | 2619 | 2651 | NM_<br>0010<br>3327<br>5.4 | Gxylt<br>1 | m<br>RN<br>A | chr15:93<br>239735-<br>9327533<br>6  | - | mmu<br>:223<br>827 | Glucoside<br>xylosyltransf<br>erose 1                     |
| mmu<br>-miR<br>-147<br>-3p | Zdh<br>hc2 | Miran<br>da_R<br>NAhy<br>brid | -22.<br>95 | 154 | 1538 | 1555 | -28.6 | 0.280<br>816 | 1538 | 1555 | NM_<br>1783<br>95.3        | Zdh<br>hc2 | m<br>RN<br>A | chr8:404<br>23002-4<br>0489592       | + | mmu<br>:705<br>46  | Palmitoyltra<br>nsferase<br>ZDHHC2                        |
| mmu<br>-miR<br>-147<br>-3p | Sug<br>p2  | Miran<br>da_R<br>NAhy<br>brid | -26.<br>61 | 155 | 45   | 68   | -32   | 0.163<br>392 | 45   | 68   | NM_<br>1727<br>55.3        | Sug<br>p2  | m<br>RN<br>A | chr8:702<br>34549-7<br>0263105       | + | mmu<br>:234<br>373 | SURP and<br>G-patch<br>domain-con<br>taining<br>protein 2 |
| mmu<br>-miR<br>-147<br>-3p | Foxl<br>1  | Miran<br>da_R<br>NAhy<br>brid | -29.<br>84 | 153 | 225  | 250  | -33.9 | 0.022<br>396 | 225  | 251  | NM_<br>0080<br>24.2        | Foxl<br>1  | m<br>RN<br>A | chr8:121<br>127685-<br>1211306<br>44 | + | mmu<br>:142<br>41  | Forkhead<br>box protein<br>L1                             |
| mmu<br>-miR<br>-147        | Slc7<br>a5 | Miran<br>da_R<br>NAhy         | -23.<br>22 | 155 | 396  | 418  | -31.4 | 0.080<br>776 | 393  | 418  | NM_<br>0114<br>04.3        | Slc7<br>a5 | m<br>RN<br>A | chr8:121<br>881146-<br>1219076       | - | mmu<br>:205<br>39  | Putative<br>uncharacteri<br>zed protein                   |

|                            |              |                               |            |     |      |      |       |              |      |      |                            |              |              |                                      |   |                    |                     |
|----------------------------|--------------|-------------------------------|------------|-----|------|------|-------|--------------|------|------|----------------------------|--------------|--------------|--------------------------------------|---|--------------------|---------------------|
| -3p                        |              | brid                          |            |     |      |      |       |              |      |      |                            |              |              | 86                                   |   |                    |                     |
| mmu<br>-miR<br>-147<br>-3p | Tnik         | Miran<br>da_R<br>NAhy<br>brid | -22.<br>89 | 151 | 2866 | 2884 | -28.5 | 0.675<br>151 | 2867 | 2885 | NM_<br>0269<br>10.1        | Tnik         | m<br>RN<br>A | chr3:282<br>63214-2<br>8670585       | + | mmu<br>:665<br>113 | Tnik protein        |
| mmu<br>-miR<br>-147<br>-3p | Il21         | Miran<br>da_R<br>NAhy<br>brid | -24.<br>91 | 150 | 1373 | 1398 | -27.9 | 0.440<br>249 | 1373 | 1398 | NM_<br>0217<br>82.3        | Il21         | m<br>RN<br>A | chr3:372<br>22759-3<br>7232636       | - | mmu<br>:605<br>05  | Interleukin-<br>21  |
| mmu<br>-miR<br>-147<br>-3p | Spry<br>1    | Miran<br>da_R<br>NAhy<br>brid | -23.<br>29 | 150 | 471  | 494  | -27.9 | 0.177<br>262 | 465  | 495  | NM_<br>0118<br>96.2        | Spry<br>1    | m<br>RN<br>A | chr3:376<br>39947-3<br>7644599       | + | mmu<br>:240<br>63  | Sprouty1            |
| mmu<br>-miR<br>-147<br>-3p | Arhg<br>ef11 | Miran<br>da_R<br>NAhy<br>brid | -23.<br>38 | 158 | 441  | 463  | -28.9 | 0.097<br>504 | 445  | 463  | NM_<br>0010<br>0391<br>2.1 | Arhg<br>ef11 | m<br>RN<br>A | chr3:876<br>17548-8<br>7738034       | + | mmu<br>:213<br>498 | Protein<br>Arhgef11 |
| mmu<br>-miR<br>-147<br>-3p | Fam<br>19a3  | Miran<br>da_R<br>NAhy<br>brid | -22.<br>21 | 157 | 539  | 561  | -31.7 | 0.139<br>952 | 532  | 562  | NM_<br>1832<br>24.3        | Fam<br>19a3  | m<br>RN<br>A | chr3:104<br>767405-<br>1047746<br>78 | - | mmu<br>:329<br>731 | Protein<br>FAM19A3  |
| mmu<br>-miR<br>-147<br>-3p | Amp<br>h     | Miran<br>da_R<br>NAhy<br>brid | -21.<br>01 | 154 | 2937 | 2959 | -27.1 | 0.748<br>858 | 2953 | 2977 | NM_<br>1750<br>07.2        | Amp<br>h     | m<br>RN<br>A | chr13:18<br>948351-<br>1915091<br>9  | + | mmu<br>:218<br>038 | Amphiphysi<br>n     |



|                            |                           |                               |            |     |      |      |       |              |      |      |                     |                           |              |                                     |   |                    |                                                             |
|----------------------------|---------------------------|-------------------------------|------------|-----|------|------|-------|--------------|------|------|---------------------|---------------------------|--------------|-------------------------------------|---|--------------------|-------------------------------------------------------------|
| mmu<br>-miR<br>-147<br>-3p | Auh                       | Miran<br>da_R<br>NAhy<br>brid | -24.<br>72 | 166 | 246  | 268  | -31.5 | 0.099<br>566 | 243  | 269  | NM_<br>0167<br>09.2 | Auh                       | m<br>RN<br>A | chr13:52<br>907020-<br>5292970<br>5 | - | mmu<br>:119<br>92  | Methylgluta<br>conyl-CoA<br>hydratase,<br>mitochondri<br>al |
| mmu<br>-miR<br>-147<br>-3p | 2010<br>111l<br>01Ri<br>k | Miran<br>da_R<br>NAhy<br>brid | -25.<br>41 | 159 | 3813 | 3832 | -29.7 | 0.357<br>533 | 3814 | 3832 | NM_<br>0280<br>79.2 | 2010<br>111l<br>01Ri<br>k | m<br>RN<br>A | chr13:62<br>964893-<br>6330287<br>7 | + | mmu<br>:720<br>61  | 2010111l01<br>Rik protein                                   |
| mmu<br>-miR<br>-147<br>-3p | Mre<br>11a                | Miran<br>da_R<br>NAhy<br>brid | -24.<br>64 | 162 | 2873 | 2893 | -29.7 | 0.311<br>972 | 2873 | 2893 | NM_<br>0187<br>36.2 | Mre<br>11a                | m<br>RN<br>A | chr9:147<br>90642-1<br>4837125      | + | mmu<br>:175<br>35  | Double-stra<br>nd break<br>repair<br>protein<br>MRE11A      |
| mmu<br>-miR<br>-147<br>-3p | Al59<br>3442              | Miran<br>da_R<br>NAhy<br>brid | -23.<br>17 | 153 | 349  | 368  | -28.6 | 0.557<br>957 | 2650 | 2668 | NM_<br>1789<br>06.5 | Al59<br>3442              | m<br>RN<br>A | chr9:526<br>73032-5<br>2679780      | - | mmu<br>:330<br>941 | Uncharacteri<br>zed protein<br>C11orf87<br>homolog          |
| mmu<br>-miR<br>-147<br>-3p | Hykk                      | Miran<br>da_R<br>NAhy<br>brid | -20.<br>39 | 150 | 1242 | 1267 | -26.5 | 0.764<br>182 | 663  | 682  | NM_<br>1773<br>51.4 | Hykk                      | m<br>RN<br>A | chr9:549<br>17290-5<br>4949924      | + | mmu<br>:235<br>386 | Hydroxylysi<br>ne kinase                                    |
| mmu<br>-miR<br>-147<br>-3p | Myo<br>1e                 | Miran<br>da_R<br>NAhy<br>brid | -21.<br>22 | 162 | 848  | 869  | -26.3 | 0.412<br>346 | 847  | 869  | NM_<br>1810<br>72.3 | Myo<br>1e                 | m<br>RN<br>A | chr9:702<br>60427-7<br>0399766      | + | mmu<br>:716<br>02  | Unconventi<br>onal<br>myosin-le                             |

|                            |                           |                               |            |     |      |      |       |              |      |      |                            |                           |              |                                      |   |                    |                                              |
|----------------------------|---------------------------|-------------------------------|------------|-----|------|------|-------|--------------|------|------|----------------------------|---------------------------|--------------|--------------------------------------|---|--------------------|----------------------------------------------|
| mmu<br>-miR<br>-147<br>-3p | Myo<br>5a                 | Miran<br>da_R<br>NAhy<br>brid | -23.<br>31 | 167 | 2240 | 2261 | -29.3 | 0.530<br>25  | 2239 | 2262 | NM_<br>0108<br>64.2        | Myo<br>5a                 | m<br>RN<br>A | chr9:750<br>71015-7<br>5223688       | + | mmu<br>:179<br>18  | Unconventi<br>onal<br>myosin-Va              |
| mmu<br>-miR<br>-147<br>-3p | Ctds<br>pl                | Miran<br>da_R<br>NAhy<br>brid | -23.<br>79 | 157 | 1877 | 1898 | -30.5 | 0.233<br>688 | 1883 | 1899 | NM_<br>1337<br>10.3        | Ctds<br>pl                | m<br>RN<br>A | chr9:118<br>929872-<br>1190441<br>19 | + | mmu<br>:692<br>74  | CTD small<br>phosphatas<br>e-like<br>protein |
| mmu<br>-miR<br>-147<br>-3p | Kdm<br>2a                 | Miran<br>da_R<br>NAhy<br>brid | -23.<br>89 | 168 | 2168 | 2192 | -30   | 0.239<br>515 | 2171 | 2192 | NM_<br>0010<br>0198<br>4.2 | Kdm<br>2a                 | m<br>RN<br>A | chr19:43<br>16144-4<br>397077        | - | mmu<br>:225<br>876 | Lysine-speci<br>fic<br>demethylas<br>e 2A    |
| mmu<br>-miR<br>-147<br>-3p | 9130<br>011E<br>15Ri<br>k | Miran<br>da_R<br>NAhy<br>brid | -28.<br>92 | 162 | 1181 | 1201 | -34.6 | 0.014<br>148 | 1180 | 1201 | NM_<br>1982<br>96.2        | 9130<br>011E<br>15Ri<br>k | m<br>RN<br>A | chr19:45<br>817364-<br>4599857<br>0  | - | mmu<br>:716<br>17  | UPF0668<br>protein<br>C10orf76<br>homolog    |
| mmu<br>-miR<br>-147<br>-3p | Nap<br>a                  | Miran<br>da_R<br>NAhy<br>brid | -20.<br>2  | 151 | 1081 | 1100 | -25.8 | 0.532<br>808 | 1065 | 1100 | NM_<br>0258<br>98.3        | Nap<br>a                  | m<br>RN<br>A | chr7:160<br>98456-1<br>6113867       | + | mmu<br>:108<br>124 | Putative<br>uncharacteri<br>zed protein      |
| mmu<br>-miR<br>-147<br>-3p | Tme<br>m14<br>5           | Miran<br>da_R<br>NAhy<br>brid | -28.<br>01 | 154 | 288  | 310  | -29   | 0.091<br>361 | 290  | 311  | NM_<br>1833<br>11.2        | Tme<br>m14<br>5           | m<br>RN<br>A | chr7:253<br>05995-2<br>5316196       | + | mmu<br>:330<br>485 | Transmemb<br>rane protein<br>145             |
| mmu<br>-miR                | Ctu1                      | Miran<br>da_R                 | -22.<br>81 | 164 | 323  | 344  | -26.8 | 0.301<br>23  | 309  | 345  | NM_<br>1455                | Ctu1                      | m<br>RN      | chr7:436<br>71976-4                  | + | mmu<br>:233        | Cytoplasmic<br>tRNA                          |

|                            |                   |                               |            |     |      |      |       |              |      |      |                     |                   |                     |                                      |   |                    |                                                      |
|----------------------------|-------------------|-------------------------------|------------|-----|------|------|-------|--------------|------|------|---------------------|-------------------|---------------------|--------------------------------------|---|--------------------|------------------------------------------------------|
| -147<br>-3p                |                   | NAhy<br>brid                  |            |     |      |      |       |              |      |      | 82.1                |                   | A                   | 3678300                              |   | 189                | 2-thiolation<br>protein 1                            |
| mmu<br>-miR<br>-147<br>-3p | Akt1<br>s1        | Miran<br>da_R<br>NAhy<br>brid | -20.<br>14 | 160 | 139  | 161  | -29.1 | 0.057<br>305 | 135  | 161  | NM_<br>0262<br>70.4 | Akt1<br>s1        | m<br>RN<br>A        | chr7:448<br>50007-4<br>4855421       | + | mmu<br>:676<br>05  | Proline-rich<br>AKT1<br>substrate 1                  |
| mmu<br>-miR<br>-147<br>-3p | Spcs<br>2         | Miran<br>da_R<br>NAhy<br>brid | -21.<br>78 | 151 | 1938 | 1963 | -27.5 | 0.430<br>499 | 1936 | 1963 | NM_<br>0256<br>68.3 | Spcs<br>2         | m<br>RN<br>A        | chr7:998<br>37569-9<br>9858883       | - | mmu<br>:666<br>24  | Signal<br>peptidase<br>complex<br>subunit 2          |
| mmu<br>-miR<br>-147<br>-3p | Stra<br>db        | Miran<br>da_R<br>NAhy<br>brid | -20.<br>24 | 154 | 229  | 250  | -25.6 | 0.286<br>19  | 217  | 251  | NM_<br>1731<br>55.1 | Stra<br>db        | mi<br>sc<br>RN<br>A | chr1:589<br>73527-5<br>8995126       | + | mmu<br>:227<br>154 | STE20-relat<br>ed kinase<br>adapter<br>protein beta  |
| mmu<br>-miR<br>-147<br>-3p | Mga<br>t5         | Miran<br>da_R<br>NAhy<br>brid | -21.<br>75 | 157 | 2819 | 2844 | -27   | 0.852<br>337 | 2818 | 2844 | NM_<br>1451<br>28.3 | Mga<br>t5         | m<br>RN<br>A        | chr1:127<br>204973-<br>1274883<br>34 | + | mmu<br>:107<br>895 | Mannoside<br>acetylglucos<br>aminyltransf<br>erase 5 |
| mmu<br>-miR<br>-147<br>-3p | Lam<br>c1         | Miran<br>da_R<br>NAhy<br>brid | -24.<br>11 | 154 | 2307 | 2331 | -28.3 | 0.384<br>614 | 2308 | 2331 | NM_<br>0106<br>83.2 | Lam<br>c1         | m<br>RN<br>A        | chr1:153<br>218922-<br>1533327<br>86 | - | mmu<br>:226<br>519 | Laminin<br>subunit<br>gamma-1                        |
| mmu<br>-miR<br>-147<br>-3p | Tmp<br>rss1<br>1f | Miran<br>da_R<br>NAhy<br>brid | -25.<br>76 | 161 | 1268 | 1287 | -31.3 | 0.117<br>673 | 1269 | 1288 | NM_<br>1787<br>30.3 | Tmp<br>rss1<br>1f | m<br>RN<br>A        | chr5:865<br>21226-8<br>6632424       | - | mmu<br>:243<br>083 | Transmemb<br>rane<br>protease<br>serine 11F          |

|                            |            |                               |            |     |      |      |       |              |      |      |                            |            |              |                                      |   |                    |                                                                               |
|----------------------------|------------|-------------------------------|------------|-----|------|------|-------|--------------|------|------|----------------------------|------------|--------------|--------------------------------------|---|--------------------|-------------------------------------------------------------------------------|
| mmu<br>-miR<br>-147<br>-3p | Fgf5       | Miran<br>da_R<br>NAhy<br>brid | -27.<br>49 | 152 | 801  | 820  | -31.7 | 0.051<br>013 | 800  | 821  | NM_<br>0102<br>03.5        | Fgf5       | m<br>RN<br>A | chr5:982<br>54184-9<br>8277033       | + | mmu<br>:141<br>76  | Fibroblast<br>growth<br>factor 5                                              |
| mmu<br>-miR<br>-147<br>-3p | Lrrc8<br>b | Miran<br>da_R<br>NAhy<br>brid | -23.<br>35 | 152 | 2960 | 2981 | -29.1 | 0.432<br>036 | 2959 | 2982 | NM_<br>0010<br>3355<br>0.2 | Lrrc8<br>b | m<br>RN<br>A | chr5:105<br>415775-<br>1054861<br>89 | + | mmu<br>:433<br>926 | Volume-reg<br>ulated anion<br>channel<br>subunit<br>LRRC8B                    |
| mmu<br>-miR<br>-147<br>-3p | Rnft<br>2  | Miran<br>da_R<br>NAhy<br>brid | -21.<br>65 | 151 | 1231 | 1251 | -27.2 | 0.581<br>524 | 1234 | 1251 | NM_<br>1729<br>98.3        | Rnft<br>2  | m<br>RN<br>A | chr5:118<br>190734-<br>1182451<br>11 | - | mmu<br>:269<br>695 | RING finger<br>and<br>transmembr<br>ane<br>domain-con<br>taining<br>protein 2 |
| mmu<br>-miR<br>-147<br>-3p | Ttyh<br>3  | Miran<br>da_R<br>NAhy<br>brid | -26.<br>94 | 154 | 80   | 104  | -31.4 | 0.139<br>434 | 80   | 105  | NM_<br>1752<br>74.4        | Ttyh<br>3  | m<br>RN<br>A | chr5:140<br>620577-<br>1406490<br>31 | - | mmu<br>:783<br>39  | Protein<br>tweety<br>homolog 3                                                |
| mmu<br>-miR<br>-147<br>-3p | Pax9       | Miran<br>da_R<br>NAhy<br>brid | -21.<br>05 | 151 | 240  | 262  | -31   | 0.159<br>477 | 230  | 263  | NM_<br>0110<br>41.2        | Pax9       | m<br>RN<br>A | chr12:56<br>694844-<br>5671282<br>4  | + | mmu<br>:185<br>11  | Paired box<br>protein<br>Pax-9                                                |
| mmu<br>-miR                | Prkc<br>h  | Miran<br>da_R                 | -25.<br>43 | 155 | 842  | 866  | -31.3 | 0.041<br>711 | 841  | 867  | NM_<br>0088                | Prkc<br>h  | m<br>RN      | chr12:73<br>584796-                  | + | mmu<br>:187        | Protein<br>kinase C eta                                                       |

|                            |            |                               |            |     |      |      |       |              |      |      |                            |            |                     |                                       |   |                    |                                                  |
|----------------------------|------------|-------------------------------|------------|-----|------|------|-------|--------------|------|------|----------------------------|------------|---------------------|---------------------------------------|---|--------------------|--------------------------------------------------|
| -147<br>-3p                |            | NAhy<br>brid                  |            |     |      |      |       |              |      |      | 56.3                       |            | A                   | 7377818<br>5                          |   | 55                 | type                                             |
| mmu<br>-miR<br>-147<br>-3p | Gph<br>b5  | Miran<br>da_R<br>NAhy<br>brid | -22.<br>7  | 150 | 125  | 150  | -27.9 | 0.189<br>245 | 125  | 151  | NM_<br>1756<br>44.3        | Gph<br>b5  | m<br>RN<br>A        | chr12:75<br>411720-<br>7541581<br>7   | - | mmu<br>:217<br>674 | Glycoprotei<br>n hormone<br>beta 5               |
| mmu<br>-miR<br>-147<br>-3p | Psen<br>1  | Miran<br>da_R<br>NAhy<br>brid | -24.<br>25 | 153 | 1260 | 1283 | -31.3 | 0.219<br>413 | 1260 | 1283 | NM_<br>0089<br>43.2        | Psen<br>1  | m<br>RN<br>A        | chr12:83<br>688145-<br>8373844<br>6   | + | mmu<br>:191<br>64  | Presenilin-1                                     |
| mmu<br>-miR<br>-147<br>-3p | Ddx<br>24  | Miran<br>da_R<br>NAhy<br>brid | -26.<br>01 | 155 | 98   | 121  | -30   | 0.005<br>71  | 97   | 122  | NM_<br>0204<br>94.3        | Ddx<br>24  | m<br>RN<br>A        | chr12:10<br>3407976<br>-103425<br>867 | - | mmu<br>:272<br>25  | ATP-depen<br>dent RNA<br>helicase<br>DDX24       |
| mmu<br>-miR<br>-147<br>-3p | Zfp1<br>74 | Miran<br>da_R<br>NAhy<br>brid | -20.<br>58 | 151 | 2070 | 2088 | -26.2 | 0.859<br>431 | 2315 | 2334 | NM_<br>0010<br>8121<br>7.1 | Zfp1<br>74 | m<br>RN<br>A        | chr16:38<br>47190-3<br>872051         | + | mmu<br>:385<br>674 | Protein<br>Zfp174                                |
| mmu<br>-miR<br>-147<br>-3p | Ercc<br>4  | Miran<br>da_R<br>NAhy<br>brid | -22.<br>13 | 168 | 1964 | 1985 | -27.6 | 0.631<br>792 | 1964 | 1986 | NM_<br>0157<br>69.2        | Ercc<br>4  | mi<br>sc<br>RN<br>A | chr16:13<br>109689-<br>1314936<br>7   | + | mmu<br>:505<br>05  | DNA repair<br>endonucleas<br>e XPF               |
| mmu<br>-miR<br>-147<br>-3p | Nrip<br>1  | Miran<br>da_R<br>NAhy<br>brid | -20.<br>79 | 159 | 1084 | 1106 | -26.2 | 0.838<br>916 | 1085 | 1107 | NM_<br>1734<br>40.2        | Nrip<br>1  | m<br>RN<br>A        | chr16:76<br>287403-<br>7632480<br>8   | - | mmu<br>:268<br>903 | Nuclear<br>receptor-int<br>eracting<br>protein 1 |

|                            |                          |                               |            |     |      |      |       |              |      |      |                            |                   |                     |                                      |   |                    |                                                            |
|----------------------------|--------------------------|-------------------------------|------------|-----|------|------|-------|--------------|------|------|----------------------------|-------------------|---------------------|--------------------------------------|---|--------------------|------------------------------------------------------------|
| mmu<br>-miR<br>-147<br>-3p | LOC<br>1081<br>6830<br>8 | Miran<br>da_R<br>NAhy<br>brid | -21.<br>75 | 160 | 1196 | 1217 | -30.5 | 0.102<br>116 | 1527 | 1559 |                            |                   |                     |                                      |   |                    |                                                            |
| mmu<br>-miR<br>-147<br>-3p | Rab<br>11fip<br>3        | Miran<br>da_R<br>NAhy<br>brid | -21.<br>71 | 159 | 1711 | 1733 | -27.6 | 0.345<br>672 | 1709 | 1734 | NM_<br>1531<br>40.2        | Rab<br>11fip<br>3 | mi<br>sc<br>RN<br>A | chr17:26<br>024378-<br>2606955<br>0  | - | mmu<br>:215<br>445 | Rab11<br>family-inter<br>acting<br>protein 3               |
| mmu<br>-miR<br>-147<br>-3p | Ankr<br>d12              | Miran<br>da_R<br>NAhy<br>brid | -24.<br>28 | 158 | 412  | 435  | -28.3 | 0.588<br>237 | 2827 | 2848 | NM_<br>0010<br>2557<br>2.1 | Ankr<br>d12       | m<br>RN<br>A        | chr17:65<br>965703-<br>6603155<br>1  | - | mmu<br>:106<br>585 | Protein<br>Ankrd12                                         |
| mmu<br>-miR<br>-147<br>-3p | Nacc<br>2                | Miran<br>da_R<br>NAhy<br>brid | -21.<br>34 | 153 | 2231 | 2253 | -26.9 | 0.795<br>461 | 2224 | 2253 | NM_<br>0264<br>95.3        | Nacc<br>2         | m<br>RN<br>A        | chr2:260<br>55536-2<br>6092396       | - | mmu<br>:679<br>91  | Nucleus<br>accumbens-<br>associated<br>protein 2           |
| mmu<br>-miR<br>-147<br>-3p | Lrrc8<br>a               | Miran<br>da_R<br>NAhy<br>brid | -26.<br>4  | 154 | 14   | 37   | -32.9 | 0.035<br>024 | 11   | 38   | NM_<br>1777<br>25.4        | Lrrc8<br>a        | m<br>RN<br>A        | chr2:302<br>37769-3<br>0263790       | + | mmu<br>:241<br>296 | Volume-reg<br>ulated anion<br>channel<br>subunit<br>LRRC8A |
| mmu<br>-miR<br>-147<br>-3p | Rims<br>4                | Miran<br>da_R<br>NAhy<br>brid | -29.<br>66 | 163 | 977  | 1001 | -34   | 0.071<br>921 | 978  | 1002 | NM_<br>1830<br>23.1        | Rims<br>4         | m<br>RN<br>A        | chr2:163<br>863881-<br>1639186<br>83 | - | mmu<br>:241<br>770 | Rims4<br>protein                                           |

|                            |                          |                               |            |     |      |      |       |              |      |      |                     |             |              |                                      |   |                    |                                                            |
|----------------------------|--------------------------|-------------------------------|------------|-----|------|------|-------|--------------|------|------|---------------------|-------------|--------------|--------------------------------------|---|--------------------|------------------------------------------------------------|
| mmu<br>-miR<br>-147<br>-3p | Cyp<br>24a1              | Miran<br>da_R<br>NAhy<br>brid | -20.<br>57 | 155 | 720  | 742  | -28   | 0.236<br>355 | 720  | 743  | NM_<br>0099<br>96.3 | Cyp<br>24a1 | m<br>RN<br>A | chr2:170<br>482957-<br>1704971<br>45 | - | mmu<br>:130<br>81  | Putative<br>uncharacteri<br>zed protein                    |
| mmu<br>-miR<br>-147<br>-3p | Tnfai<br>p8              | Miran<br>da_R<br>NAhy<br>brid | -20.<br>07 | 151 | 1723 | 1742 | -29.4 | 0.249<br>543 | 1976 | 1995 | NM_<br>1341<br>31.2 | Tnfai<br>p8 | m<br>RN<br>A | chr18:49<br>979427-<br>5009322<br>9  | + | mmu<br>:106<br>869 | Tumor<br>necrosis<br>factor<br>alpha-induc<br>ed protein 8 |
| mmu<br>-miR<br>-147<br>-3p | LOC<br>1081<br>6839<br>5 | Miran<br>da_R<br>NAhy<br>brid | -26.<br>02 | 168 | 1057 | 1078 | -28.6 | 0.194<br>703 | 1057 | 1079 |                     |             |              |                                      |   |                    |                                                            |
| mmu<br>-miR<br>-98-<br>5p  | Pap<br>pa                | Miran<br>da_R<br>NAhy<br>brid | -22.<br>79 | 165 | 4255 | 4280 | -26.8 | 0.792<br>268 | 4254 | 4281 | NM_<br>0213<br>62.1 | Pap<br>pa   | m<br>RN<br>A | chr4:651<br>24174-6<br>5357509       | + | mmu<br>:184<br>91  | Pappalysin-<br>1                                           |
| mmu<br>-miR<br>-98-<br>5p  | Acot<br>11               | Miran<br>da_R<br>NAhy<br>brid | -21.<br>14 | 166 | 3677 | 3701 | -28.9 | 0.330<br>034 | 3676 | 3702 | NM_<br>0255<br>90.4 | Acot<br>11  | m<br>RN<br>A | chr4:106<br>744561-<br>1067998<br>31 | - | mmu<br>:329<br>910 | Acyl-coenzy<br>me A<br>thioesterase<br>11                  |
| mmu<br>-miR<br>-98-<br>5p  | Svop<br>l                | Miran<br>da_R<br>NAhy<br>brid | -22.<br>02 | 162 | 866  | 888  | -25.2 | 0.559<br>112 | 868  | 889  | NM_<br>1772<br>00.4 | Svop<br>l   | m<br>RN<br>A | chr6:379<br>84752-3<br>8047012       | - | mmu<br>:320<br>590 | Putative<br>transporter<br>SVOPL                           |

|                           |             |                               |            |     |      |      |       |              |      |      |                            |            |              |                                      |   |                    |                                           |
|---------------------------|-------------|-------------------------------|------------|-----|------|------|-------|--------------|------|------|----------------------------|------------|--------------|--------------------------------------|---|--------------------|-------------------------------------------|
| mmu<br>-miR<br>-98-<br>5p | Tet3        | Miran<br>da_R<br>NAhy<br>brid | -20.<br>26 | 154 | 2689 | 2713 | -27.5 | 0.680<br>474 | 3546 | 3570 | NM_<br>1831<br>38.2        | Tet3       | m<br>RN<br>A | chr6:833<br>62373-8<br>3457242       | - | mmu<br>:194<br>388 | Methylcytosi<br>ne<br>dioxygenase<br>TET3 |
| mmu<br>-miR<br>-98-<br>5p | Gm5<br>878  | Miran<br>da_R<br>NAhy<br>brid | -20.<br>88 | 164 | 875  | 896  | -27.6 | 0.531<br>513 | 400  | 430  | NM_<br>0010<br>3490<br>2.2 | Gm5<br>878 | m<br>RN<br>A | chr6:851<br>11416-8<br>5126094       | - | mmu<br>:545<br>861 | Protein<br>Gm5878                         |
| mmu<br>-miR<br>-98-<br>5p | Etnk<br>1   | Miran<br>da_R<br>NAhy<br>brid | -22.<br>63 | 155 | 3428 | 3451 | -29   | 0.413<br>679 | 3429 | 3452 | NM_<br>0292<br>50.2        | Etnk<br>1  | m<br>RN<br>A | chr6:143<br>167230-<br>1432085<br>46 | + | mmu<br>:753<br>20  | Putative<br>uncharacteri<br>zed protein   |
| mmu<br>-miR<br>-98-<br>5p | Gm4<br>0814 | Miran<br>da_R<br>NAhy<br>brid | -22.<br>73 | 165 | 100  | 122  | -28.4 | 0.127<br>641 | 99   | 122  |                            |            |              |                                      |   |                    |                                           |
| mmu<br>-miR<br>-98-<br>5p | Sow<br>aha  | Miran<br>da_R<br>NAhy<br>brid | -21.<br>89 | 171 | 569  | 591  | -25.6 | 0.515<br>767 | 565  | 592  | NM_<br>1831<br>73.2        | Sow<br>aha | m<br>RN<br>A | chr11:53<br>476578-<br>5348019<br>5  | - | mmu<br>:237<br>761 | Ankrd43<br>protein                        |
| mmu<br>-miR<br>-98-<br>5p | Il13        | Miran<br>da_R<br>NAhy<br>brid | -21.<br>41 | 165 | 434  | 456  | -26.9 | 0.122<br>299 | 421  | 457  | NM_<br>0083<br>55.3        | Il13       | m<br>RN<br>A | chr11:53<br>631323-<br>5363470<br>2  | - | mmu<br>:161<br>63  | Interleukin-<br>13                        |
| mmu<br>-miR<br>6          | Acsl<br>6   | Miran<br>da_R                 | -20.<br>85 | 155 | 390  | 413  | -25.1 | 0.871<br>055 | 380  | 414  | NM_<br>1448                | Acsl<br>6  | m<br>RN      | chr11:54<br>315297-                  | + | mmu<br>:216        | Long-chain<br>acyl-CoA                    |



|               |              |                   |        |     |      |      |       |          |      |      |             |         |      |                         |   |            |                                                     |
|---------------|--------------|-------------------|--------|-----|------|------|-------|----------|------|------|-------------|---------|------|-------------------------|---|------------|-----------------------------------------------------|
| -98-5p        |              | NAhybrid          |        |     |      |      |       |          |      |      | 23.4        |         | A    | 54364126                |   | 739        | synthetase                                          |
| mmu-miR-98-5p | Fnip1        | Miranda_RNAhybrid | -24.37 | 176 | 1159 | 1180 | -25.9 | 0.652079 | 1160 | 1181 | NM_173753.4 | Fnip1   | mRNA | chr11:54438145-54516884 | + | mmu:216742 | Folliculin-interacting protein 1                    |
| mmu-miR-98-5p | Jmjd4        | Miranda_RNAhybrid | -24.38 | 165 | 316  | 338  | -27.1 | 0.495957 | 316  | 339  | NM_178659.6 | Jmjd4   | mRNA | chr11:59450045-59458567 | + | mmu:194952 | JmjC domain-containing protein 4                    |
| mmu-miR-98-5p | LOC108167918 | Miranda_RNAhybrid | -22.73 | 165 | 100  | 122  | -28.4 | 0.136124 | 99   | 122  |             |         |      |                         |   |            |                                                     |
| mmu-miR-98-5p | Igf2bp1      | Miranda_RNAhybrid | -25.12 | 172 | 4122 | 4143 | -28.7 | 0.534799 | 4121 | 4144 | NM_009951.4 | Igf2bp1 | mRNA | chr11:95957163-96005944 | - | mmu:140486 | Insulin-like growth factor 2 mRNA-binding protein 1 |
| mmu-miR-98-5p | LOC108167806 | Miranda_RNAhybrid | -22.73 | 165 | 100  | 122  | -28.4 | 0.122471 | 99   | 122  |             |         |      |                         |   |            |                                                     |
| mmu-miR-1081  | LOC1081      | Miranda_RNAhybrid | -22.73 | 165 | 157  | 179  | -28.4 | 0.075538 | 156  | 179  |             |         |      |                         |   |            |                                                     |

|               |         |                   |        |     |      |      |       |          |      |      |             |         |      |                           |   |            |                                                      |
|---------------|---------|-------------------|--------|-----|------|------|-------|----------|------|------|-------------|---------|------|---------------------------|---|------------|------------------------------------------------------|
| -98-5p        | 67809   | NAhybrid          |        |     |      |      |       |          |      |      |             |         |      |                           |   |            |                                                      |
| mmu-miR-98-5p | Fam207a | Miranda_RNAhybrid | -21.35 | 150 | 1411 | 1434 | -26.4 | 0.39134  | 1409 | 1435 | NM_133998.3 | Fam207a | mRNA | chr10:77486661-77516924   | - | mmu:108707 | Protein FAM207A                                      |
| mmu-miR-98-5p | Cdc34   | Miranda_RNAhybrid | -23.23 | 158 | 54   | 75   | -25.9 | 0.065382 | 59   | 76   | NM_177613.2 | Cdc34   | mRNA | chr10:79682203-79688398   | + | mmu:216150 | Ubiquitin-conjugating enzyme E2R1                    |
| mmu-miR-98-5p | Fgd6    | Miranda_RNAhybrid | -22.32 | 161 | 507  | 528  | -25.2 | 0.854535 | 494  | 529  | NM_053072.3 | Fgd6    | mRNA | chr10:94036001-94145339   | + | mmu:13998  | Fgd6 protein                                         |
| mmu-miR-98-5p | Hmga2   | Miranda_RNAhybrid | -21.83 | 164 | 8    | 28   | -25.3 | 0.79013  | 8    | 29   | NM_010441.2 | Hmga2   | mRNA | chr10:120361275-120476935 | - | mmu:15364  | High mobility group protein HMGI-C                   |
| mmu-miR-98-5p | Kcnv1   | Miranda_RNAhybrid | -21.23 | 164 | 3031 | 3055 | -25.3 | 0.997449 | 3029 | 3055 | NM_026200.3 | Kcnv1   | mRNA | chr15:45096086-45116490   | - | mmu:67498  | Potassium voltage-gated channel subfamily V member 1 |
| mmu-miR       | Pced1b  | Miranda_R         | -22.63 | 165 | 226  | 247  | -26.5 | 0.040552 | 225  | 247  | NM_1722     | Pced1b  | mRNA | chr15:97247412-           | + | mmu:239    | PC-esterase domain-con                               |

|               |        |                   |        |     |      |      |       |          |      |      |             |        |      |                           |   |            |                                             |
|---------------|--------|-------------------|--------|-----|------|------|-------|----------|------|------|-------------|--------|------|---------------------------|---|------------|---------------------------------------------|
| -98-5p        |        | NAhybrid          |        |     |      |      |       |          |      |      | 93.4        |        | A    | 97385693                  |   | 647        | taining protein 1B                          |
| mmu-miR-98-5p | Dhh    | Miranda_RNAhybrid | -20.03 | 170 | 2059 | 2079 | -25.1 | 0.796653 | 2058 | 2079 | NM_007857.4 | Dhh    | mRNA | chr15:98893027-98895957   | - | mmu:13363  | Desert hedgehog protein                     |
| mmu-miR-98-5p | Letmd1 | Miranda_RNAhybrid | -21.81 | 164 | 1064 | 1086 | -25.6 | 0.418249 | 1063 | 1086 | NM_134093.2 | Letmd1 | mRNA | chr15:100469018-100479164 | + | mmu:68614  | LETM1 domain-containing protein 1           |
| mmu-miR-98-5p | Cbx5   | Miranda_RNAhybrid | -20.44 | 159 | 6659 | 6681 | -28.2 | 0.700872 | 1036 | 1067 | NM_007626.3 | Cbx5   | mRNA | chr15:103191678-103215362 | - | mmu:12419  | Chromobox protein homolog 5                 |
| mmu-miR-98-5p | Hsh2d  | Miranda_RNAhybrid | -20.39 | 167 | 138  | 161  | -25.4 | 0.028911 | 137  | 161  | NM_197944.1 | Hsh2d  | mRNA | chr8:72189668-72200958    | + | mmu:209488 | Hematopoietic SH2 domain-containing protein |
| mmu-miR-98-5p | Nkd1   | Miranda_RNAhybrid | -21.62 | 158 | 359  | 382  | -27   | 0.481183 | 363  | 382  | NM_027280.3 | Nkd1   | mRNA | chr8:88521344-88594887    | + | mmu:93960  | Protein naked cuticle homolog 1             |
| mmu-miR-98-5p | Nod2   | Miranda_RNAhybrid | -20.27 | 169 | 1362 | 1385 | -25.2 | 0.536581 | 1361 | 1385 | NM_145857.2 | Nod2   | mRNA | chr8:88647314-88684464    | + | mmu:257632 | CARD15 short isoform                        |

|                           |                  |                               |            |     |      |      |       |              |      |      |                            |                  |              |                                      |   |                    |                                             |
|---------------------------|------------------|-------------------------------|------------|-----|------|------|-------|--------------|------|------|----------------------------|------------------|--------------|--------------------------------------|---|--------------------|---------------------------------------------|
| 5p                        |                  | brid                          |            |     |      |      |       |              |      |      |                            |                  |              |                                      |   |                    |                                             |
| mmu<br>-miR<br>-98-<br>5p | Elmo<br>3        | Miran<br>da_R<br>NAhy<br>brid | -22.<br>82 | 170 | 204  | 225  | -30.3 | 0.022<br>372 | 200  | 225  | NM_<br>1727<br>60.3        | Elmo<br>3        | m<br>RN<br>A | chr8:105<br>305601-<br>1053106<br>23 | + | mmu<br>:234<br>683 | Elmo3<br>protein                            |
| mmu<br>-miR<br>-98-<br>5p | Clcn<br>5        | Miran<br>da_R<br>NAhy<br>brid | -24        | 171 | 4145 | 4167 | -25.5 | 0.939<br>365 | 4145 | 4168 | NM_<br>0166<br>91.4        | Clcn<br>5        | m<br>RN<br>A | chrx:715<br>5160-72<br>76896         | - | mmu<br>:127<br>28  | Chloride<br>channel<br>protein              |
| mmu<br>-miR<br>-98-<br>5p | Gucy<br>2f       | Miran<br>da_R<br>NAhy<br>brid | -21.<br>92 | 157 | 3453 | 3477 | -25.7 | 0.937<br>759 | 3451 | 3477 | NM_<br>0010<br>0757<br>6.2 | Gucy<br>2f       | m<br>RN<br>A | chrx:142<br>083290-<br>1421972<br>76 | - | mmu<br>:245<br>650 | Retinal<br>guanylyl<br>cyclase 2            |
| mmu<br>-miR<br>-98-<br>5p | Klf8             | Miran<br>da_R<br>NAhy<br>brid | -23.<br>61 | 176 | 1479 | 1500 | -26.5 | 0.788<br>871 | 1478 | 1500 | NM_<br>1737<br>80.4        | Klf8             | m<br>RN<br>A | chrx:153<br>237422-<br>1533978<br>86 | + | mmu<br>:245<br>671 | Krueppel-lik<br>e factor 8                  |
| mmu<br>-miR<br>-98-<br>5p | Gja8             | Miran<br>da_R<br>NAhy<br>brid | -21.<br>23 | 167 | 3346 | 3368 | -27.3 | 0.697<br>721 | 142  | 167  | NM_<br>0081<br>23.3        | Gja8             | m<br>RN<br>A | chr3:969<br>13566-9<br>6926051       | - | mmu<br>:146<br>16  | Gap<br>junction<br>alpha-8<br>protein       |
| mmu<br>-miR<br>-98-<br>5p | Cyb<br>561<br>d1 | Miran<br>da_R<br>NAhy<br>brid | -21.<br>93 | 168 | 1205 | 1226 | -26.2 | 0.701<br>613 | 1210 | 1227 | NM_<br>0280<br>61.1        | Cyb<br>561<br>d1 | m<br>RN<br>A | chr3:108<br>195771-<br>1082021<br>26 | - | mmu<br>:720<br>23  | Cytochrome<br>b561<br>domain-con<br>taining |

|                           |                          |                               |            |     |      |      |       |              |      |      |                     |              |                     |                                |   |                    |                                                                      |
|---------------------------|--------------------------|-------------------------------|------------|-----|------|------|-------|--------------|------|------|---------------------|--------------|---------------------|--------------------------------|---|--------------------|----------------------------------------------------------------------|
|                           |                          |                               |            |     |      |      |       |              |      |      |                     |              |                     |                                |   |                    | protein 1                                                            |
| mmu<br>-miR<br>-98-<br>5p | LOC<br>1081<br>6806<br>7 | Miran<br>da_R<br>NAhy<br>brid | -22.<br>73 | 165 | 100  | 122  | -28.4 | 0.036<br>702 | 99   | 122  |                     |              |                     |                                |   |                    |                                                                      |
| mmu<br>-miR<br>-98-<br>5p | Gm4<br>1035              | Miran<br>da_R<br>NAhy<br>brid | -22.<br>73 | 165 | 157  | 179  | -28.4 | 0.129<br>486 | 156  | 179  |                     |              |                     |                                |   |                    |                                                                      |
| mmu<br>-miR<br>-98-<br>5p | Vst<br>m5                | Miran<br>da_R<br>NAhy<br>brid | -20.<br>65 | 164 | 395  | 415  | -25.1 | 0.568<br>259 | 387  | 416  | NM_<br>0269<br>55.2 | Vst<br>m5    | mi<br>sc<br>RN<br>A | chr9:152<br>38923-1<br>5259421 | + | mmu<br>:691<br>37  | V-set and<br>transmembr<br>ane<br>domain-con<br>taining<br>protein 5 |
| mmu<br>-miR<br>-98-<br>5p | Rnf2<br>14               | Miran<br>da_R<br>NAhy<br>brid | -21.<br>44 | 162 | 5388 | 5411 | -25.8 | 0.963<br>327 | 5388 | 5411 | NM_<br>1787<br>09.4 | Rnf2<br>14   | m<br>RN<br>A        | chr9:458<br>56769-4<br>5906435 | - | mmu<br>:235<br>315 | RING finger<br>protein 214                                           |
| mmu<br>-miR<br>-98-<br>5p | Rdx                      | Miran<br>da_R<br>NAhy<br>brid | -20.<br>6  | 167 | 962  | 983  | -25.6 | 0.636<br>68  | 951  | 984  | NM_<br>0090<br>41.3 | Rdx          | m<br>RN<br>A        | chr9:520<br>47150-5<br>2088738 | + | mmu<br>:196<br>84  | Radixin                                                              |
| mmu<br>-miR               | 1700<br>017B             | Miran<br>da_R                 | -21.<br>81 | 159 | 263  | 286  | -25.3 | 0.301<br>013 | 267  | 287  | NM_<br>0288         | 1700<br>017B | m<br>RN             | chr9:572<br>53117-5            | - | mmu<br>:742        | Uncharacteri<br>zed protein                                          |

|               |         |                   |        |     |      |      |       |          |      |      |             |        |      |                          |   |            |                                                       |
|---------------|---------|-------------------|--------|-----|------|------|-------|----------|------|------|-------------|--------|------|--------------------------|---|------------|-------------------------------------------------------|
| -98-5p        | 05Rik   | NAhybrid          |        |     |      |      |       |          |      |      | 20.2        | 05Rik  | A    | 7262410                  |   | 11         | C15orf39 homolog                                      |
| mmu-miR-98-5p | Tmod2   | Miranda_RNAhybrid | -23.37 | 163 | 5792 | 5816 | -27   | 0.874412 | 5791 | 5817 | NM_016711.3 | Tmod2  | mRNA | chr9:75565621-75610330   | - | mmu:50876  | Tropomodulin-2                                        |
| mmu-miR-98-5p | Prr23a3 | Miranda_RNAhybrid | -21.67 | 170 | 235  | 257  | -25.4 | 0.279247 | 240  | 257  |             |        |      |                          |   |            |                                                       |
| mmu-miR-98-5p | Tusc2   | Miranda_RNAhybrid | -21.85 | 159 | 473  | 497  | -26.3 | 0.28811  | 472  | 498  | NM_019742.4 | Tusc2  | mRNA | chr9:107563255-107566108 | + | mmu:80385  | Tumor suppressor candidate 2                          |
| mmu-miR-98-5p | Vps13a  | Miranda_RNAhybrid | -21.03 | 166 | 880  | 900  | -25.7 | 0.732931 | 870  | 901  | NM_173028.4 | Vps13a | mRNA | chr19:16615366-16780933  | - | mmu:271564 | Putative uncharacterized protein Vps13a 5' variant II |
| mmu-miR-98-5p | Tmem2   | Miranda_RNAhybrid | -20.63 | 162 | 1545 | 1566 | -26.7 | 0.4109   | 1542 | 1567 | NM_031997.4 | Tmem2  | mRNA | chr19:21778340-21858360  | + | mmu:83921  | Transmembrane protein 2                               |
| mmu-miR-98-5p | Kcnk6   | Miranda_RNAhybrid | -21.54 | 159 | 2885 | 2904 | -25.2 | 0.818737 | 2888 | 2905 | NM_00103352 | Kcnk6  | mRNA | chr7:29221928-29232522   | - | mmu:52150  | Kcnk6 protein                                         |

|                           |                           |                               |            |     |     |     |       |              |     |     |                            |                           |              |                                      |   |                    |                                                       |
|---------------------------|---------------------------|-------------------------------|------------|-----|-----|-----|-------|--------------|-----|-----|----------------------------|---------------------------|--------------|--------------------------------------|---|--------------------|-------------------------------------------------------|
| 5p                        |                           | brid                          |            |     |     |     |       |              |     |     | 5.3                        |                           |              |                                      |   |                    |                                                       |
| mmu<br>-miR<br>-98-<br>5p | LOC<br>1081<br>6741<br>5  | Miran<br>da_R<br>NAhy<br>brid | -22.<br>73 | 165 | 100 | 122 | -28.4 | 0.087<br>87  | 99  | 122 |                            |                           |              |                                      |   |                    |                                                       |
| mmu<br>-miR<br>-98-<br>5p | Sec1                      | Miran<br>da_R<br>NAhy<br>brid | -20.<br>17 | 159 | 496 | 518 | -25.2 | 0.281<br>737 | 419 | 438 | NM_<br>0199<br>34.2        | Sec1                      | m<br>RN<br>A | chr7:456<br>77686-4<br>5684247       | - | mmu<br>:565<br>46  | Galactoside<br>2-alpha-L-f<br>ucosyltransf<br>erase 3 |
| mmu<br>-miR<br>-98-<br>5p | E030<br>018B<br>13Ri<br>k | Miran<br>da_R<br>NAhy<br>brid | -22.<br>9  | 160 | 916 | 934 | -29.3 | 0.054<br>191 | 915 | 935 | NM_<br>0012<br>5631<br>1.1 | E030<br>018B<br>13Ri<br>k | m<br>RN<br>A | chr7:639<br>19164-6<br>3921029       | + | mmu<br>:381<br>994 | Protein<br>E030018B13<br>Rik                          |
| mmu<br>-miR<br>-98-<br>5p | LOC<br>1081<br>6743<br>4  | Miran<br>da_R<br>NAhy<br>brid | -22.<br>73 | 165 | 100 | 122 | -28.4 | 0.136<br>124 | 99  | 122 |                            |                           |              |                                      |   |                    |                                                       |
| mmu<br>-miR<br>-98-<br>5p | Clpb                      | Miran<br>da_R<br>NAhy<br>brid | -22.<br>19 | 165 | 908 | 929 | -26.5 | 0.594<br>319 | 912 | 930 | NM_<br>0091<br>91.3        | Clpb                      | m<br>RN<br>A | chr7:101<br>721982-<br>1017907<br>21 | + | mmu<br>:204<br>80  | Caseinolytic<br>peptidase B<br>protein<br>homolog     |
| mmu<br>-miR<br>-98-<br>5p | Eef2<br>k                 | Miran<br>da_R<br>NAhy<br>brid | -22.<br>66 | 169 | 623 | 645 | -25.3 | 0.866<br>593 | 624 | 645 | NM_<br>0079<br>08.4        | Eef2<br>k                 | m<br>RN<br>A | chr7:120<br>842829-<br>1209072<br>17 | + | mmu<br>:136<br>31  | Eukaryotic<br>elongation<br>factor 2<br>kinase        |

|                           |                          |                               |            |     |      |      |       |              |      |      |                     |             |                     |                                      |   |                    |                                                                 |
|---------------------------|--------------------------|-------------------------------|------------|-----|------|------|-------|--------------|------|------|---------------------|-------------|---------------------|--------------------------------------|---|--------------------|-----------------------------------------------------------------|
| mmu<br>-miR<br>-98-<br>5p | Mrpl<br>15               | Miran<br>da_R<br>NAhy<br>brid | -20.<br>02 | 153 | 1090 | 1111 | -26   | 0.714<br>289 | 2452 | 2478 | NM_<br>0253<br>00.4 | Mrpl<br>15  | mi<br>sc<br>RN<br>A | chr1:477<br>3198-47<br>85726         | - | mmu<br>:273<br>95  | Mitochondri<br>al ribosomal<br>protein L15,<br>isoform<br>CRA_a |
| mmu<br>-miR<br>-98-<br>5p | Fam<br>126b              | Miran<br>da_R<br>NAhy<br>brid | -20.<br>99 | 151 | 3947 | 3969 | -25.6 | 0.953<br>668 | 6215 | 6241 | NM_<br>1725<br>13.3 | Fam<br>126b | m<br>RN<br>A        | chr1:585<br>22806-5<br>8586154       | - | mmu<br>:213<br>056 | Protein<br>FAM126B                                              |
| mmu<br>-miR<br>-98-<br>5p | Ccdc<br>93               | Miran<br>da_R<br>NAhy<br>brid | -22.<br>26 | 160 | 3028 | 3049 | -25.2 | 0.941<br>303 | 3028 | 3049 | NM_<br>0299<br>55.3 | Ccdc<br>93  | m<br>RN<br>A        | chr1:121<br>431067-<br>1215064<br>60 | + | mmu<br>:708<br>29  | Coiled-coil<br>domain-con<br>taining<br>protein 93              |
| mmu<br>-miR<br>-98-<br>5p | LOC<br>1081<br>6772<br>5 | Miran<br>da_R<br>NAhy<br>brid | -22.<br>73 | 165 | 100  | 122  | -28.4 | 0.129<br>609 | 99   | 122  |                     |             |                     |                                      |   |                    |                                                                 |
| mmu<br>-miR<br>-98-<br>5p | Fasl                     | Miran<br>da_R<br>NAhy<br>brid | -22.<br>97 | 167 | 350  | 371  | -26.6 | 0.178<br>048 | 350  | 372  | NM_<br>0101<br>77.4 | Fasl        | m<br>RN<br>A        | chr1:161<br>780691-<br>1617884<br>95 | - | mmu<br>:141<br>03  | Fas ligand                                                      |
| mmu<br>-miR<br>-98-<br>5p | LOC<br>1052<br>4403<br>4 | Miran<br>da_R<br>NAhy<br>brid | -22.<br>73 | 165 | 157  | 179  | -28.4 | 0.134<br>649 | 156  | 179  |                     |             |                     |                                      |   |                    |                                                                 |



|                           |                          |                               |            |     |      |      |       |              |      |      |                     |            |              |                                |   |                    |                                                 |
|---------------------------|--------------------------|-------------------------------|------------|-----|------|------|-------|--------------|------|------|---------------------|------------|--------------|--------------------------------|---|--------------------|-------------------------------------------------|
| mmu<br>-miR<br>-98-<br>5p | Gm3<br>9743              | Miran<br>da_R<br>NAhy<br>brid | -22.<br>73 | 165 | 289  | 311  | -28.4 | 0.118<br>531 | 288  | 311  |                     |            |              |                                |   |                    |                                                 |
| mmu<br>-miR<br>-98-<br>5p | Gm2<br>1759              | Miran<br>da_R<br>NAhy<br>brid | -26.<br>29 | 172 | 77   | 96   | -27.8 | 0.071<br>636 | 77   | 97   |                     |            |              |                                |   |                    |                                                 |
| mmu<br>-miR<br>-98-<br>5p | Gm4<br>2102              | Miran<br>da_R<br>NAhy<br>brid | -22.<br>73 | 165 | 100  | 122  | -28.4 | 0.119<br>27  | 99   | 122  |                     |            |              |                                |   |                    |                                                 |
| mmu<br>-miR<br>-98-<br>5p | Fras<br>1                | Miran<br>da_R<br>NAhy<br>brid | -22.<br>7  | 165 | 145  | 169  | -26.3 | 0.626<br>215 | 147  | 170  | NM_<br>1754<br>73.3 | Fras<br>1  | m<br>RN<br>A | chr5:963<br>73819-9<br>6784733 | + | mmu<br>:231<br>470 | Extracellular<br>matrix<br>protein<br>FRAS1     |
| mmu<br>-miR<br>-98-<br>5p | LOC<br>1081<br>6800<br>3 | Miran<br>da_R<br>NAhy<br>brid | -22.<br>73 | 165 | 100  | 122  | -28.4 | 0.124<br>318 | 99   | 122  |                     |            |              |                                |   |                    |                                                 |
| mmu<br>-miR<br>-98-<br>5p | Grin<br>2a               | Miran<br>da_R<br>NAhy<br>brid | -21.<br>08 | 155 | 2938 | 2963 | -25.1 | 0.928<br>136 | 2938 | 2963 | NM_<br>0081<br>70.2 | Grin<br>2a | m<br>RN<br>A | chr16:96<br>21275-9<br>995132  | - | mmu<br>:148<br>11  | Glutamate<br>receptor<br>ionotropic,<br>NMDA 2A |
| mmu<br>-miR<br>3          | Rabl<br>3                | Miran<br>da_R                 | -21.<br>34 | 156 | 95   | 116  | -25   | 0.507<br>652 | 94   | 117  | NM_<br>0262         | Rabl<br>3  | m<br>RN      | chr16:37<br>539894-            | + | mmu<br>:676        | Rab-like<br>protein 3                           |

|               |               |                   |        |     |      |      |       |          |      |      |             |               |      |                         |   |            |                                 |
|---------------|---------------|-------------------|--------|-----|------|------|-------|----------|------|------|-------------|---------------|------|-------------------------|---|------------|---------------------------------|
| -98-5p        |               | NAhybrid          |        |     |      |      |       |          |      |      | 97.1        |               | A    | 37572385                |   | 57         |                                 |
| mmu-miR-98-5p | Gm41476       | Miranda_RNAhybrid | -22.73 | 165 | 100  | 122  | -28.4 | 0.066718 | 99   | 122  |             |               |      |                         |   |            |                                 |
| mmu-miR-98-5p | 4930488N24Rik | Miranda_RNAhybrid | -23.17 | 158 | 328  | 352  | -25.1 | 0.301515 | 330  | 353  | XR_397312.1 | 4930488N24Rik | mRNA | chr17:14101817-14107866 | - | mmu:75011  | RIKEN cDNA4930488N24 gene       |
| mmu-miR-98-5p | Wdr27         | Miranda_RNAhybrid | -23.42 | 156 | 88   | 107  | -26.9 | 0.28074  | 87   | 107  | NM_175173.3 | Wdr27         | mRNA | chr17:14784829-14943151 | - | mmu:71682  | WD repeat-containing protein 27 |
| mmu-miR-98-5p | Crb3          | Miranda_RNAhybrid | -23.95 | 171 | 152  | 174  | -29.4 | 0.203187 | 151  | 174  | NM_177638.4 | Crb3          | mRNA | chr17:57061627-57065920 | + | mmu:224912 | Protein crumbs homolog 3        |
| mmu-miR-98-5p | Gm37416       | Miranda_RNAhybrid | -22.73 | 165 | 363  | 385  | -28.4 | 0.161786 | 362  | 385  |             |               |      |                         |   |            |                                 |
| mmu-miR-98-5p | Tbc1d13       | Miranda_RNAhybrid | -21.83 | 155 | 1186 | 1208 | -25   | 0.735875 | 1186 | 1208 | NM_146252.2 | Tbc1d13       | mRNA | chr2:30142536-30152012  | + | mmu:70296  | TBC1 domain family member 13    |

|                           |                     |                               |            |     |      |      |       |              |      |      |                     |                  |                     |                                      |   |                   |                                                                    |
|---------------------------|---------------------|-------------------------------|------------|-----|------|------|-------|--------------|------|------|---------------------|------------------|---------------------|--------------------------------------|---|-------------------|--------------------------------------------------------------------|
| mmu<br>-miR<br>-98-<br>5p | Pbx3                | Miran<br>da_R<br>NAhy<br>brid | -22.<br>34 | 165 | 858  | 879  | -25   | 0.549<br>198 | 860  | 879  | NM_<br>0167<br>68.2 | Pbx3             | m<br>RN<br>A        | chr2:341<br>71457-3<br>4371692       | - | mmu<br>:185<br>16 | Pre-B-cell<br>leukemia<br>transcription<br>factor 3                |
| mmu<br>-miR<br>-98-<br>5p | Katn<br>bl1         | Miran<br>da_R<br>NAhy<br>brid | -21.<br>23 | 161 | 1053 | 1072 | -25.4 | 0.582<br>799 | 1053 | 1072 | NM_<br>0242<br>54.3 | Katn<br>bl1      | m<br>RN<br>A        | chr2:112<br>379211-<br>1124142<br>37 | + | mmu<br>:724<br>25 | Putative<br>uncharacteri<br>zed protein                            |
| mmu<br>-miR<br>-98-<br>5p | Trp5<br>3bp<br>1    | Miran<br>da_R<br>NAhy<br>brid | -20.<br>34 | 168 | 3080 | 3101 | -25.6 | 0.807<br>987 | 3074 | 3101 | NM_<br>0137<br>35.4 | Trp5<br>3bp<br>1 | m<br>RN<br>A        | chr2:121<br>194835-<br>1212520<br>27 | - | mmu<br>:272<br>23 | Tumor<br>suppressor<br>p53-binding<br>protein 1                    |
| mmu<br>-miR<br>-98-<br>5p | Grpe<br>l2          | Miran<br>da_R<br>NAhy<br>brid | -22.<br>35 | 172 | 2436 | 2457 | -27   | 0.558<br>59  | 2436 | 2457 | NM_<br>0212<br>96.2 | Grpe<br>l2       | mi<br>sc<br>RN<br>A | chr18:61<br>712424-<br>6172636<br>0  | - | mmu<br>:177<br>14 | GrpE<br>protein<br>homolog 2,<br>mitochondri<br>al                 |
| mmu<br>-miR<br>-98-<br>5p | Ptpn<br>2           | Miran<br>da_R<br>NAhy<br>brid | -23.<br>97 | 165 | 3401 | 3422 | -25.3 | 0.972<br>319 | 3405 | 3423 | NM_<br>0089<br>77.3 | Ptpn<br>2        | m<br>RN<br>A        | chr18:67<br>665501-<br>6772475<br>8  | - | mmu<br>:192<br>55 | Tyrosine-pr<br>otein<br>phosphatas<br>e<br>non-recept<br>or type 2 |
| mmu<br>-miR<br>-98-<br>5p | LOC<br>1081<br>6837 | Miran<br>da_R<br>NAhy         | -22.<br>73 | 165 | 100  | 122  | -28.4 | 0.148<br>258 | 99   | 122  |                     |                  |                     |                                      |   |                   |                                                                    |

|                            |            |                               |            |     |      |      |       |              |      |      |                     |            |                |                                      |   |                    |                                                         |
|----------------------------|------------|-------------------------------|------------|-----|------|------|-------|--------------|------|------|---------------------|------------|----------------|--------------------------------------|---|--------------------|---------------------------------------------------------|
| 5p                         | 6          | brid                          |            |     |      |      |       |              |      |      |                     |            |                |                                      |   |                    |                                                         |
| mmu<br>-miR<br>-10a<br>-5p | Ankr<br>d6 | Miran<br>da_R<br>NAhy<br>brid | -22.<br>41 | 153 | 1029 | 1055 | -25.2 | 0.825<br>686 | 1031 | 1056 | NM_<br>0804<br>71.3 | Ankr<br>d6 | m<br>RN<br>A   | chr4:328<br>04027-3<br>2864810       | - | mmu<br>:140<br>577 | Ankyrin<br>repeat<br>domain-con<br>taining<br>protein 6 |
| mmu<br>-miR<br>-10a<br>-5p | Tmo<br>d1  | Miran<br>da_R<br>NAhy<br>brid | -23.<br>72 | 154 | 1455 | 1478 | -25.3 | 0.729<br>402 | 1456 | 1479 | NM_<br>0218<br>83.2 | Tmo<br>d1  | m<br>RN<br>A   | chr4:460<br>38940-4<br>6104015       | + | mmu<br>:219<br>16  | Tropomodul<br>in-1                                      |
| mmu<br>-miR<br>-10a<br>-5p | Nr4a<br>3  | Miran<br>da_R<br>NAhy<br>brid | -25.<br>38 | 161 | 1046 | 1068 | -28.7 | 0.441<br>534 | 1036 | 1069 | NM_<br>0157<br>43.2 | Nr4a<br>3  | m<br>RN<br>A   | chr4:480<br>44889-4<br>8086447       | + | mmu<br>:181<br>24  | Nr4a3<br>protein                                        |
| mmu<br>-miR<br>-10a<br>-5p | Cer1       | Miran<br>da_R<br>NAhy<br>brid | -20.<br>21 | 160 | 208  | 232  | -25.1 | 0.489<br>133 | 207  | 232  | NM_<br>0098<br>87.2 | Cer1       | m<br>RN<br>A   | chr4:828<br>81751-8<br>2885151       | - | mmu<br>:126<br>22  | Cerberus 1<br>homolog<br>(Xenopus<br>laevis)            |
| mmu<br>-miR<br>-10a<br>-5p | Faf1       | Miran<br>da_R<br>NAhy<br>brid | -23.<br>84 | 167 | 1962 | 1987 | -27.1 | 0.528<br>391 | 1964 | 1987 | NM_<br>0079<br>83.2 | Faf1       | m<br>RN<br>A   | chr4:109<br>676627-<br>1099639<br>60 | + | mmu<br>:140<br>84  | FAS-associa<br>ted factor 1                             |
| mmu<br>-miR<br>-10a        | Slc5<br>a9 | Miran<br>da_R<br>NAhy         | -22.<br>91 | 163 | 1690 | 1714 | -26.2 | 0.688<br>54  | 1690 | 1715 | NM_<br>1455<br>51.4 | Slc5<br>a9 | mi<br>sc<br>RN | chr4:111<br>885528-<br>1119027       | - | mmu<br>:230<br>612 | Sodium/glu<br>cose<br>cotransport                       |

|                            |                           |                               |            |     |      |      |       |              |      |      |                            |                           |              |                                      |   |                    |                                                                     |
|----------------------------|---------------------------|-------------------------------|------------|-----|------|------|-------|--------------|------|------|----------------------------|---------------------------|--------------|--------------------------------------|---|--------------------|---------------------------------------------------------------------|
| -5p                        |                           | brid                          |            |     |      |      |       |              |      |      |                            | A                         | 83           |                                      |   | er 4               |                                                                     |
| mmu<br>-miR<br>-10a<br>-5p | D83<br>0031<br>N03<br>Rik | Miran<br>da_R<br>NAhy<br>brid | -23.<br>06 | 164 | 2357 | 2383 | -28   | 0.618<br>101 | 2357 | 2383 | NM_<br>0011<br>6791<br>8.1 | D83<br>0031<br>N03<br>Rik | m<br>RN<br>A | chr4:123<br>403601-<br>1234119<br>11 | - | mmu<br>:442<br>834 | Uncharacteri<br>zed protein<br>KIAA0754                             |
| mmu<br>-miR<br>-10a<br>-5p | Gm1<br>3083               | Miran<br>da_R<br>NAhy<br>brid | -26.<br>26 | 165 | 656  | 678  | -28.5 | 0.141<br>652 | 659  | 679  | NM_<br>0011<br>2632<br>4.1 | Gm1<br>3083               | m<br>RN<br>A | chr4:143<br>615060-<br>1436187<br>38 | + | mmu<br>:279<br>185 | Protein<br>Gm13083                                                  |
| mmu<br>-miR<br>-10a<br>-5p | Agtr<br>ap                | Miran<br>da_R<br>NAhy<br>brid | -22.<br>61 | 152 | 2808 | 2831 | -26.5 | 0.805<br>866 | 2800 | 2832 | NM_<br>0096<br>42.4        | Agtr<br>ap                | m<br>RN<br>A | chr4:148<br>077061-<br>1480880<br>64 | - | mmu<br>:116<br>10  | Type-1<br>angiotensin<br>II<br>receptor-as<br>sociated<br>protein   |
| mmu<br>-miR<br>-10a<br>-5p | Vwa<br>1                  | Miran<br>da_R<br>NAhy<br>brid | -21.<br>77 | 168 | 1062 | 1084 | -26.2 | 0.623<br>187 | 1059 | 1084 | NM_<br>1477<br>76.4        | Vwa<br>1                  | m<br>RN<br>A | chr4:155<br>769300-<br>1557727<br>98 | - | mmu<br>:246<br>228 | von<br>Willebrand<br>factor A<br>domain-con<br>taining<br>protein 1 |
| mmu<br>-miR<br>-10a<br>-5p | Nxp<br>h1                 | Miran<br>da_R<br>NAhy<br>brid | -24.<br>96 | 160 | 602  | 626  | -26.2 | 0.996<br>515 | 603  | 627  | NM_<br>0087<br>51.5        | Nxp<br>h1                 | m<br>RN<br>A | chr6:894<br>7788-92<br>59863         | + | mmu<br>:182<br>31  | Neurexophil<br>in                                                   |

|                            |              |                               |            |     |     |     |       |              |     |     |                     |              |                     |                                      |   |                    |                                                                          |
|----------------------------|--------------|-------------------------------|------------|-----|-----|-----|-------|--------------|-----|-----|---------------------|--------------|---------------------|--------------------------------------|---|--------------------|--------------------------------------------------------------------------|
| mmu<br>-miR<br>-10a<br>-5p | Irf5         | Miran<br>da_R<br>NAhy<br>brid | -25.<br>03 | 156 | 75  | 99  | -26.3 | 0.181<br>801 | 75  | 99  | NM_<br>0120<br>57.4 | Irf5         | m<br>RN<br>A        | chr6:295<br>29243-2<br>9537320       | + | mmu<br>:270<br>56  | Interferon<br>regulatory<br>factor 5<br>bone<br>marrow<br>variant        |
| mmu<br>-miR<br>-10a<br>-5p | Svop<br>l    | Miran<br>da_R<br>NAhy<br>brid | -20.<br>92 | 163 | 201 | 222 | -29.5 | 0.169<br>62  | 196 | 222 | NM_<br>1772<br>00.4 | Svop<br>l    | m<br>RN<br>A        | chr6:379<br>84752-3<br>8047012       | - | mmu<br>:320<br>590 | Putative<br>transporter<br>SVOPL                                         |
| mmu<br>-miR<br>-10a<br>-5p | Adck<br>2    | Miran<br>da_R<br>NAhy<br>brid | -20.<br>73 | 159 | 824 | 845 | -28.7 | 0.184<br>261 | 805 | 846 | NM_<br>1788<br>73.3 | Adck<br>2    | m<br>RN<br>A        | chr6:395<br>73876-3<br>9588769       | + | mmu<br>:578<br>69  | Uncharacteri<br>zed aarF<br>domain-con<br>taining<br>protein<br>kinase 2 |
| mmu<br>-miR<br>-10a<br>-5p | Arhg<br>ap25 | Miran<br>da_R<br>NAhy<br>brid | -21.<br>74 | 156 | 75  | 97  | -25.8 | 0.565<br>15  | 67  | 98  | NM_<br>1754<br>76.4 | Arhg<br>ap25 | mi<br>sc<br>RN<br>A | chr6:874<br>58545-8<br>7496327       | - | mmu<br>:232<br>201 | Rho GTPase<br>activating<br>protein 25                                   |
| mmu<br>-miR<br>-10a<br>-5p | Prpt3        | Miran<br>da_R<br>NAhy<br>brid | -24.<br>33 | 154 | 209 | 233 | -25.2 | 0.367<br>342 | 199 | 234 | NM_<br>1724<br>87.4 | Prpt3        | m<br>RN<br>A        | chr6:113<br>493638-<br>1135018<br>43 | - | mmu<br>:210<br>673 | Proline-rich<br>transmembr<br>ane protein<br>3, isoform<br>CRA_b         |

|                            |             |                               |            |     |      |      |       |              |      |      |                            |             |                     |                                      |   |                    |                                                                       |
|----------------------------|-------------|-------------------------------|------------|-----|------|------|-------|--------------|------|------|----------------------------|-------------|---------------------|--------------------------------------|---|--------------------|-----------------------------------------------------------------------|
| mmu<br>-miR<br>-10a<br>-5p | Vgll<br>4   | Miran<br>da_R<br>NAhy<br>brid | -22.<br>94 | 153 | 1407 | 1429 | -26.7 | 0.473<br>74  | 1405 | 1430 | NM_<br>1776<br>83.2        | Vgll<br>4   | m<br>RN<br>A        | chr6:114<br>860621-<br>1149010<br>36 | - | mmu<br>:232<br>334 | Transcriptio<br>n cofactor<br>vestigial-like<br>protein 4             |
| mmu<br>-miR<br>-10a<br>-5p | Syn2        | Miran<br>da_R<br>NAhy<br>brid | -21.<br>74 | 160 | 1888 | 1913 | -27.1 | 0.557<br>856 | 1885 | 1914 | NM_<br>0136<br>81.3        | Syn2        | m<br>RN<br>A        | chr6:115<br>134902-<br>1152765<br>63 | + | mmu<br>:209<br>65  | Synapsin-2                                                            |
| mmu<br>-miR<br>-10a<br>-5p | Tmc<br>c1   | Miran<br>da_R<br>NAhy<br>brid | -25.<br>05 | 162 | 1079 | 1101 | -28.4 | 0.527<br>493 | 1087 | 1102 | NM_<br>1774<br>12.1        | Tmc<br>c1   | m<br>RN<br>A        | chr6:116<br>018611-<br>1161933<br>73 | - | mmu<br>:330<br>401 | Transmemb<br>rane and<br>coiled-coil<br>domains<br>protein 1          |
| mmu<br>-miR<br>-10a<br>-5p | Crac<br>r2a | Miran<br>da_R<br>NAhy<br>brid | -22.<br>59 | 153 | 893  | 917  | -26.6 | 0.878<br>015 | 894  | 918  | NM_<br>0010<br>3346<br>4.3 | Crac<br>r2a | mi<br>sc<br>RN<br>A | chr6:127<br>594740-<br>1276676<br>64 | + | mmu<br>:381<br>812 | EF-hand<br>calcium-bin<br>ding<br>domain-con<br>taining<br>protein 4B |
| mmu<br>-miR<br>-10a<br>-5p | Ascc<br>2   | Miran<br>da_R<br>NAhy<br>brid | -22.<br>73 | 155 | 1133 | 1158 | -25.4 | 0.867<br>102 | 1138 | 1159 | NM_<br>0292<br>91.1        | Ascc<br>2   | m<br>RN<br>A        | chr11:46<br>37698-4<br>685699        | + | mmu<br>:754<br>52  | Putative<br>uncharacteri<br>zed protein                               |
| mmu<br>-miR<br>-10a        | Lcp2        | Miran<br>da_R<br>NAhy         | -26.<br>23 | 174 | 467  | 489  | -27.5 | 0.370<br>749 | 468  | 490  | NM_<br>0106<br>96.3        | Lcp2        | m<br>RN<br>A        | chr11:34<br>047201-<br>3409228       | + | mmu<br>:168<br>22  | Lymphocyte<br>cytosolic<br>protein 2                                  |

|                            |             |                               |            |     |      |      |       |              |      |      |                     |             |              |                                     |   |                   |                                                                                     |
|----------------------------|-------------|-------------------------------|------------|-----|------|------|-------|--------------|------|------|---------------------|-------------|--------------|-------------------------------------|---|-------------------|-------------------------------------------------------------------------------------|
| -5p                        |             | brid                          |            |     |      |      |       |              |      |      |                     |             | 0            |                                     |   |                   |                                                                                     |
| mmu<br>-miR<br>-10a<br>-5p | Cyfi<br>p2  | Miran<br>da_R<br>NAhy<br>brid | -21.<br>08 | 150 | 992  | 1011 | -25   | 0.894<br>121 | 997  | 1012 | NM_<br>1337<br>69.3 | Cyfi<br>p2  | m<br>RN<br>A | chr11:46<br>193855-<br>4631236<br>4 | - | mmu<br>:768<br>84 | Cytoplasmic<br>FMR1-intera<br>cting<br>protein 2                                    |
| mmu<br>-miR<br>-10a<br>-5p | Shro<br>om1 | Miran<br>da_R<br>NAhy<br>brid | -22.<br>27 | 163 | 359  | 380  | -29.8 | 0.047<br>559 | 351  | 380  | NM_<br>0279<br>17.3 | Shro<br>om1 | m<br>RN<br>A | chr11:53<br>457205-<br>5346776<br>6 | + | mmu<br>:717<br>74 | Shroom<br>family<br>member 1,<br>isoform<br>CRA_a                                   |
| mmu<br>-miR<br>-10a<br>-5p | Slc2<br>a4  | Miran<br>da_R<br>NAhy<br>brid | -21.<br>9  | 150 | 958  | 978  | -25.1 | 0.589<br>607 | 952  | 978  | NM_<br>0092<br>04.2 | Slc2<br>a4  | m<br>RN<br>A | chr11:69<br>942286-<br>6994819<br>0 | - | mmu<br>:205<br>28 | Solute<br>carrier<br>family 2,<br>facilitated<br>glucose<br>transporter<br>member 4 |
| mmu<br>-miR<br>-10a<br>-5p | Ccdc<br>92b | Miran<br>da_R<br>NAhy<br>brid | -21.<br>93 | 157 | 1723 | 1745 | -27.3 | 0.633<br>664 | 1721 | 1746 |                     |             |              |                                     |   |                   |                                                                                     |
| mmu<br>-miR<br>-10a<br>-5p | Mett<br>l16 | Miran<br>da_R<br>NAhy<br>brid | -21.<br>22 | 153 | 3532 | 3558 | -25.5 | 0.997<br>327 | 3530 | 3558 | NM_<br>0261<br>97.3 | Mett<br>l16 | m<br>RN<br>A | chr11:74<br>770837-<br>7482582<br>3 | + | mmu<br>:674<br>93 | Methyltransf<br>erese-like<br>protein 16                                            |



|                            |         |                   |        |     |      |      |       |          |      |      |             |         |      |                           |   |            |                                    |
|----------------------------|---------|-------------------|--------|-----|------|------|-------|----------|------|------|-------------|---------|------|---------------------------|---|------------|------------------------------------|
| mmu<br>-miR<br>-10a<br>-5p | Mmd     | Miranda_RNAhybrid | -22.03 | 152 | 1196 | 1220 | -29.2 | 0.225849 | 1193 | 1220 | NM_026178.2 | Mmd     | mRNA | chr11:90249297-90251618   | + | mmu:67468  | Putative uncharacterized protein   |
| mmu<br>-miR<br>-10a<br>-5p | Smarce1 | Miranda_RNAhybrid | -21.88 | 151 | 439  | 459  | -25.5 | 0.497762 | 438  | 460  | NM_020618.4 | Smarce1 | mRNA | chr11:99209047-99231339   | - | mmu:57376  | Smarce1 variant 3                  |
| mmu<br>-miR<br>-10a<br>-5p | Zfp385c | Miranda_RNAhybrid | -25.55 | 156 | 526  | 545  | -27.9 | 0.494522 | 525  | 546  | NM_177790.4 | Zfp385c | mRNA | chr11:100627543-100692450 | - | mmu:278304 | Zinc finger protein 385C           |
| mmu<br>-miR<br>-10a<br>-5p | Mapt    | Miranda_RNAhybrid | -21.53 | 153 | 631  | 653  | -25.2 | 0.95993  | 628  | 654  | NM_010838.4 | Mapt    | mRNA | chr11:104231327-104332090 | + | mmu:17762  | Microtubule-associated protein tau |
| mmu<br>-miR<br>-10a<br>-5p | Limd2   | Miranda_RNAhybrid | -25.07 | 151 | 843  | 873  | -28.9 | 0.333068 | 842  | 873  | NM_172397.3 | Limd2   | mRNA | chr11:106158035-106159965 | - | mmu:67803  | LIM domain-containing protein 2    |
| mmu<br>-miR<br>-10a<br>-5p | Prkca   | Miranda_RNAhybrid | -24.17 | 155 | 2587 | 2608 | -26.9 | 0.911773 | 2586 | 2608 | NM_011101.3 | Prkca   | mRNA | chr11:107933387-108343888 | - | mmu:18750  | Protein kinase C alpha type        |

|                            |             |                               |            |     |      |      |       |              |      |      |                     |             |              |                                       |   |                    |                                                                                        |
|----------------------------|-------------|-------------------------------|------------|-----|------|------|-------|--------------|------|------|---------------------|-------------|--------------|---------------------------------------|---|--------------------|----------------------------------------------------------------------------------------|
| mmu<br>-miR<br>-10a<br>-5p | Map<br>2k6  | Miran<br>da_R<br>NAhy<br>brid | -28.<br>04 | 168 | 31   | 55   | -29.7 | 0.338<br>874 | 33   | 56   | NM_<br>0119<br>43.2 | Map<br>2k6  | m<br>RN<br>A | chr11:11<br>0399103<br>-110516<br>201 | + | mmu<br>:263<br>99  | Dual-specifi<br>city<br>mitogen-act<br>ivated<br>protein<br>kinase<br>kinase 6         |
| mmu<br>-miR<br>-10a<br>-5p | Nplo<br>c4  | Miran<br>da_R<br>NAhy<br>brid | -20.<br>07 | 162 | 1268 | 1291 | -25.2 | 0.893<br>754 | 1267 | 1291 | NM_<br>1994<br>69.2 | Nplo<br>c4  | m<br>RN<br>A | chr11:12<br>0379798<br>-120437<br>700 | - | mmu<br>:217<br>365 | Nuclear<br>protein<br>localization<br>protein 4<br>homolog                             |
| mmu<br>-miR<br>-10a<br>-5p | Slc2<br>a12 | Miran<br>da_R<br>NAhy<br>brid | -23.<br>29 | 158 | 25   | 47   | -27   | 0.466<br>585 | 23   | 47   | NM_<br>1789<br>34.4 | Slc2<br>a12 | m<br>RN<br>A | chr10:22<br>612730-<br>2270318<br>3   | + | mmu<br>:353<br>169 | Solute<br>carrier<br>family 2<br>(Facilitated<br>glucose<br>transporter),<br>member 12 |
| mmu<br>-miR<br>-10a<br>-5p | C2c<br>d4c  | Miran<br>da_R<br>NAhy<br>brid | -24.<br>47 | 157 | 3971 | 3993 | -26.7 | 0.895<br>855 | 3970 | 3994 | NM_<br>1986<br>14.3 | C2c<br>d4c  | m<br>RN<br>A | chr10:79<br>606854-<br>7961401<br>8   | - | mmu<br>:237<br>397 | C2<br>calcium-dep<br>endent<br>domain-con<br>taining<br>protein 4C                     |

|                            |                  |                               |            |     |      |      |       |              |      |      |                            |                  |              |                                     |   |                    |                                                                     |
|----------------------------|------------------|-------------------------------|------------|-----|------|------|-------|--------------|------|------|----------------------------|------------------|--------------|-------------------------------------|---|--------------------|---------------------------------------------------------------------|
| mmu<br>-miR<br>-10a<br>-5p | Gna<br>11        | Miran<br>da_R<br>NAhy<br>brid | -20.<br>28 | 150 | 544  | 566  | -25.2 | 0.822<br>181 | 1315 | 1341 | NM_<br>0103<br>01.3        | Gna<br>11        | m<br>RN<br>A | chr10:81<br>528732-<br>8154504<br>6 | - | mmu<br>:146<br>72  | Guanine<br>nucleotide-<br>binding<br>protein<br>subunit<br>alpha-11 |
| mmu<br>-miR<br>-10a<br>-5p | Zfp4<br>33       | Miran<br>da_R<br>NAhy<br>brid | -22.<br>15 | 165 | 1306 | 1325 | -25.2 | 0.860<br>484 | 1305 | 1325 | NM_<br>0012<br>4306<br>7.1 | Zfp4<br>33       | m<br>RN<br>A | chr10:81<br>704192-<br>8172197<br>6 | + | mmu<br>:736<br>10  | Protein<br>Zfp433                                                   |
| mmu<br>-miR<br>-10a<br>-5p | Gm3<br>2687      | Miran<br>da_R<br>NAhy<br>brid | -22.<br>15 | 165 | 1306 | 1325 | -25.2 | 0.858<br>336 | 1305 | 1325 |                            |                  |              |                                     |   |                    |                                                                     |
| mmu<br>-miR<br>-10a<br>-5p | Gm3<br>3378      | Miran<br>da_R<br>NAhy<br>brid | -22.<br>15 | 165 | 1304 | 1323 | -25.2 | 0.904<br>552 | 1303 | 1323 |                            |                  |              |                                     |   |                    |                                                                     |
| mmu<br>-miR<br>-10a<br>-5p | Vezt             | Miran<br>da_R<br>NAhy<br>brid | -24.<br>21 | 159 | 3428 | 3450 | -25.8 | 0.998<br>613 | 3420 | 3451 | NM_<br>1725<br>38.4        | Vezt             | m<br>RN<br>A | chr10:93<br>961522-<br>9403579<br>9 | - | mmu<br>:215<br>008 | Vezatin                                                             |
| mmu<br>-miR<br>-10a<br>-5p | Ankr<br>d33<br>b | Miran<br>da_R<br>NAhy<br>brid | -24.<br>97 | 153 | 995  | 1019 | -26.2 | 0.950<br>2   | 996  | 1020 | NM_<br>0274<br>96.3        | Ankr<br>d33<br>b | m<br>RN<br>A | chr15:31<br>291479-<br>3136775<br>9 | - | mmu<br>:674<br>34  | Ankyrin<br>repeat<br>domain-con<br>taining                          |

|                            |                           |                               |            |     |       |       |       |              |       |       |                            |                           |              |                                     |   |                    |                                                                   |
|----------------------------|---------------------------|-------------------------------|------------|-----|-------|-------|-------|--------------|-------|-------|----------------------------|---------------------------|--------------|-------------------------------------|---|--------------------|-------------------------------------------------------------------|
|                            |                           |                               |            |     |       |       |       |              |       |       |                            |                           |              |                                     |   |                    | protein 33B                                                       |
| mmu<br>-miR<br>-10a<br>-5p | Kcnv<br>1                 | Miran<br>da_R<br>NAhy<br>brid | -23.<br>85 | 164 | 12575 | 12597 | -28.2 | 0.939<br>758 | 12571 | 12598 | NM_<br>0262<br>00.3        | Kcnv<br>1                 | m<br>RN<br>A | chr15:45<br>096086-<br>4511649<br>0 | - | mmu<br>:674<br>98  | Potassium<br>voltage-gat<br>ed channel<br>subfamily V<br>member 1 |
| mmu<br>-miR<br>-10a<br>-5p | Trap<br>pc9               | Miran<br>da_R<br>NAhy<br>brid | -22.<br>89 | 154 | 1083  | 1105  | -25.1 | 0.751<br>305 | 1066  | 1106  | NM_<br>1806<br>62.2        | Trap<br>pc9               | m<br>RN<br>A | chr15:72<br>589620-<br>7305581<br>2 | - | mmu<br>:765<br>10  | Trafficking<br>protein<br>particle<br>complex<br>subunit 9        |
| mmu<br>-miR<br>-10a<br>-5p | 1810<br>041L<br>15Ri<br>k | Miran<br>da_R<br>NAhy<br>brid | -26.<br>22 | 155 | 173   | 200   | -29.2 | 0.557<br>78  | 173   | 201   | NM_<br>0011<br>6314<br>5.1 | 1810<br>041L<br>15Ri<br>k | m<br>RN<br>A | chr15:84<br>379203-<br>8444666<br>6 | - | mmu<br>:723<br>01  | Protein<br>1810041L15<br>Rik                                      |
| mmu<br>-miR<br>-10a<br>-5p | Ttl8                      | Miran<br>da_R<br>NAhy<br>brid | -24.<br>22 | 161 | 276   | 297   | -27.1 | 0.421<br>372 | 276   | 298   | NM_<br>1728<br>18.3        | Ttl8                      | m<br>RN<br>A | chr15:88<br>917458-<br>8895564<br>2 | - | mmu<br>:239<br>591 | Protein<br>monoglycyl<br>ase TTL8                                 |
| mmu<br>-miR<br>-10a<br>-5p | Slc3<br>8a2               | Miran<br>da_R<br>NAhy<br>brid | -22.<br>09 | 155 | 903   | 925   | -26.7 | 0.699<br>58  | 904   | 925   | NM_<br>1751<br>21.3        | Slc3<br>8a2               | m<br>RN<br>A | chr15:96<br>687392-<br>9669972<br>4 | - | mmu<br>:677<br>60  | Putative<br>uncharacteri<br>zed protein                           |
| mmu<br>-miR                | Insr                      | Miran<br>da_R                 | -24.<br>4  | 166 | 772   | 794   | -26   | 0.937<br>264 | 773   | 795   | NM_<br>0105                | Insr                      | m<br>RN      | chr8:315<br>0922-32                 | - | mmu<br>:163        | Insulin<br>receptor                                               |

|                            |             |                               |            |     |      |      |       |              |      |      |                     |             |              |                                      |   |                    |                                                          |
|----------------------------|-------------|-------------------------------|------------|-----|------|------|-------|--------------|------|------|---------------------|-------------|--------------|--------------------------------------|---|--------------------|----------------------------------------------------------|
| -10a<br>-5p                |             | NAhy<br>brid                  |            |     |      |      |       |              |      |      | 68.2                |             | A            | 79649                                |   | 37                 | isoform B                                                |
| mmu<br>-miR<br>-10a<br>-5p | Ppp<br>1r3b | Miran<br>da_R<br>NAhy<br>brid | -23.<br>47 | 155 | 674  | 695  | -26.4 | 0.804<br>762 | 666  | 696  | NM_<br>1777<br>41.3 | Ppp<br>1r3b | m<br>RN<br>A | chr8:353<br>75667-3<br>5388139       | + | mmu<br>:244<br>416 | Protein<br>phosphatas<br>e 1<br>regulatory<br>subunit 3B |
| mmu<br>-miR<br>-10a<br>-5p | Nfix        | Miran<br>da_R<br>NAhy<br>brid | -22.<br>22 | 157 | 1803 | 1829 | -25.9 | 0.912<br>115 | 1793 | 1829 | NM_<br>0109<br>06.3 | Nfix        | m<br>RN<br>A | chr8:847<br>04717-8<br>4780806       | - | mmu<br>:180<br>32  | Nuclear<br>factor 1<br>X-type                            |
| mmu<br>-miR<br>-10a<br>-5p | Nfat<br>5   | Miran<br>da_R<br>NAhy<br>brid | -22.<br>45 | 161 | 1178 | 1200 | -26.7 | 0.968<br>588 | 1176 | 1200 | NM_<br>1339<br>57.3 | Nfat<br>5   | m<br>RN<br>A | chr8:107<br>331084-<br>1073744<br>74 | + | mmu<br>:544<br>46  | Nuclear<br>factor<br>of-activated<br>T-cells 5           |
| mmu<br>-miR<br>-10a<br>-5p | Disc<br>1   | Miran<br>da_R<br>NAhy<br>brid | -22.<br>66 | 156 | 156  | 178  | -27   | 0.748<br>996 | 152  | 179  | NM_<br>1748<br>54.2 | Disc<br>1   | m<br>RN<br>A | chr8:125<br>054195-<br>1252611<br>51 | + | mmu<br>:244<br>667 | Disrupted in<br>schizophreni<br>a 1<br>homolog           |
| mmu<br>-miR<br>-10a<br>-5p | Myc<br>s    | Miran<br>da_R<br>NAhy<br>brid | -24.<br>43 | 162 | 243  | 268  | -28.3 | 0.127<br>982 | 244  | 269  | NM_<br>0108<br>50.2 | Myc<br>s    | m<br>RN<br>A | chrx:546<br>6904-54<br>69265         | - | mmu<br>:178<br>70  | Protein<br>S-Myc                                         |
| mmu<br>-miR<br>-10a        | Atp7<br>a   | Miran<br>da_R<br>NAhy         | -24        | 165 | 755  | 777  | -26.5 | 0.817<br>899 | 759  | 777  | NM_<br>0097<br>26.5 | Atp7<br>a   | m<br>RN<br>A | chrx:106<br>027224-<br>1061281       | + | mmu<br>:119<br>77  | Copper-tran<br>sporting<br>ATPase 1                      |

|                            |                           |                               |            |     |     |     |       |              |     |     |                     |                           |              |                                      |   |                    |                                                                                                       |
|----------------------------|---------------------------|-------------------------------|------------|-----|-----|-----|-------|--------------|-----|-----|---------------------|---------------------------|--------------|--------------------------------------|---|--------------------|-------------------------------------------------------------------------------------------------------|
| -5p                        |                           | brid                          |            |     |     |     |       |              |     |     |                     |                           |              | 60                                   |   |                    |                                                                                                       |
| mmu<br>-miR<br>-10a<br>-5p | Nduf<br>b5                | Miran<br>da_R<br>NAhy<br>brid | -29.<br>19 | 174 | 149 | 171 | -32.8 | 0.004<br>626 | 148 | 172 | NM_<br>0253<br>16.2 | Nduf<br>b5                | m<br>RN<br>A | chr3:327<br>37107-3<br>2751236       | + | mmu<br>:660<br>46  | NADH<br>dehydrogen<br>ase<br>[ubiquinone<br>] 1 beta<br>subcomplex<br>subunit 5,<br>mitochondri<br>al |
| mmu<br>-miR<br>-10a<br>-5p | E130<br>311K<br>13Ri<br>k | Miran<br>da_R<br>NAhy<br>brid | -26.<br>14 | 163 | 210 | 232 | -30.7 | 0.029<br>636 | 202 | 233 | NM_<br>1778<br>56.4 | E130<br>311K<br>13Ri<br>k | m<br>RN<br>A | chr3:639<br>14696-6<br>3929385       | - | mmu<br>:329<br>659 | Protein<br>C3orf33<br>homolog                                                                         |
| mmu<br>-miR<br>-10a<br>-5p | Tmi<br>gd3                | Miran<br>da_R<br>NAhy<br>brid | -21.<br>57 | 151 | 696 | 716 | -25   | 0.586<br>638 | 700 | 716 |                     |                           |              |                                      |   |                    |                                                                                                       |
| mmu<br>-miR<br>-10a<br>-5p | Ador<br>a3                | Miran<br>da_R<br>NAhy<br>brid | -21.<br>57 | 151 | 696 | 716 | -25   | 0.586<br>638 | 700 | 716 | NM_<br>0270<br>25.4 | Ador<br>a3                | m<br>RN<br>A | chr3:105<br>904421-<br>1059089<br>28 | + | mmu<br>:115<br>42  | Adenosine<br>receptor A3                                                                              |
| mmu<br>-miR<br>-10a        | Arsj                      | Miran<br>da_R<br>NAhy         | -22.<br>23 | 155 | 325 | 350 | -26.2 | 0.371<br>378 | 327 | 351 | NM_<br>1734<br>51.3 | Arsj                      | m<br>RN<br>A | chr3:126<br>363852-<br>1264403       | + | mmu<br>:271<br>970 | Arylsulfatase<br>J                                                                                    |

|                            |            |                               |            |     |      |      |       |              |      |      |                     |            |              |                                      |   |                    |                                                   |
|----------------------------|------------|-------------------------------|------------|-----|------|------|-------|--------------|------|------|---------------------|------------|--------------|--------------------------------------|---|--------------------|---------------------------------------------------|
| -5p                        |            | brid                          |            |     |      |      |       |              |      |      |                     |            | 74           |                                      |   |                    |                                                   |
| mmu<br>-miR<br>-10a<br>-5p | Tnni<br>3k | Miran<br>da_R<br>NAhy<br>brid | -25.<br>47 | 171 | 135  | 157  | -29.7 | 0.025<br>451 | 133  | 158  | NM_<br>1770<br>66.5 | Tnni<br>3k | m<br>RN<br>A | chr3:154<br>792779-<br>1550554<br>02 | - | mmu<br>:435<br>766 | Serine/threo<br>nine-protei<br>n kinase<br>TNNI3K |
| mmu<br>-miR<br>-10a<br>-5p | Neg<br>r1  | Miran<br>da_R<br>NAhy<br>brid | -23.<br>49 | 161 | 5674 | 5696 | -27   | 0.893<br>983 | 5674 | 5697 | NM_<br>1772<br>74.4 | Neg<br>r1  | m<br>RN<br>A | chr3:156<br>561799-<br>1572284<br>95 | + | mmu<br>:320<br>840 | Neuronal<br>growth<br>regulator 1                 |
| mmu<br>-miR<br>-10a<br>-5p | E2f3       | Miran<br>da_R<br>NAhy<br>brid | -23.<br>45 | 157 | 3212 | 3231 | -25.8 | 0.883<br>688 | 3004 | 3037 | NM_<br>0100<br>93.3 | E2f3       | m<br>RN<br>A | chr13:29<br>906575-<br>2998439<br>1  | - | mmu<br>:135<br>57  | E2F<br>transcription<br>factor 3                  |
| mmu<br>-miR<br>-10a<br>-5p | Ssr1       | Miran<br>da_R<br>NAhy<br>brid | -26.<br>36 | 150 | 5481 | 5503 | -26.5 | 0.976<br>044 | 5481 | 5504 | NM_<br>0259<br>65.3 | Ssr1       | m<br>RN<br>A | chr13:37<br>971401-<br>3799419<br>0  | - | mmu<br>:107<br>513 | Putative<br>uncharacteri<br>zed protein           |
| mmu<br>-miR<br>-10a<br>-5p | Jarid<br>2 | Miran<br>da_R<br>NAhy<br>brid | -21.<br>78 | 162 | 1163 | 1186 | -25.5 | 0.704<br>618 | 1163 | 1186 | NM_<br>0218<br>78.3 | Jarid<br>2 | m<br>RN<br>A | chr13:44<br>729535-<br>4492163<br>8  | + | mmu<br>:164<br>68  | Protein<br>Jumonji                                |
| mmu<br>-miR<br>-10a<br>-5p | Id4        | Miran<br>da_R<br>NAhy<br>brid | -21.<br>57 | 151 | 989  | 1010 | -26   | 0.449<br>168 | 989  | 1010 | NM_<br>0311<br>66.2 | Id4        | m<br>RN<br>A | chr13:48<br>261427-<br>4826403<br>6  | + | mmu<br>:159<br>04  | DNA-bindin<br>g protein<br>inhibitor<br>ID-4      |

|                            |                           |                               |            |     |      |      |       |              |      |      |                     |                           |              |                                       |   |                    |                                                                                                   |
|----------------------------|---------------------------|-------------------------------|------------|-----|------|------|-------|--------------|------|------|---------------------|---------------------------|--------------|---------------------------------------|---|--------------------|---------------------------------------------------------------------------------------------------|
| mmu<br>-miR<br>-10a<br>-5p | 2010<br>111l<br>01Ri<br>k | Miran<br>da_R<br>NAhy<br>brid | -21.<br>42 | 151 | 1375 | 1395 | -26.4 | 0.865<br>974 | 1376 | 1396 | NM_<br>0280<br>79.2 | 2010<br>111l<br>01Ri<br>k | m<br>RN<br>A | chr13:62<br>964893-<br>6330287<br>7   | + | mmu<br>:720<br>61  | 2010111l01<br>Rik protein                                                                         |
| mmu<br>-miR<br>-10a<br>-5p | Zfp3<br>67                | Miran<br>da_R<br>NAhy<br>brid | -24.<br>77 | 160 | 209  | 236  | -27.1 | 0.561<br>023 | 210  | 237  | NM_<br>1754<br>94.4 | Zfp3<br>67                | m<br>RN<br>A | chr13:64<br>133025-<br>6415238<br>2   | - | mmu<br>:238<br>673 | Zinc finger<br>protein 367                                                                        |
| mmu<br>-miR<br>-10a<br>-5p | Zfp6<br>5                 | Miran<br>da_R<br>NAhy<br>brid | -23.<br>4  | 157 | 1559 | 1580 | -26.1 | 0.782<br>461 | 1561 | 1580 | NM_<br>1456<br>22.2 | Zfp6<br>5                 | m<br>RN<br>A | chr13:67<br>705306-<br>6772917<br>3   | - | mmu<br>:235<br>907 | Protein<br>Zfp65                                                                                  |
| mmu<br>-miR<br>-10a<br>-5p | Slc6<br>a19               | Miran<br>da_R<br>NAhy<br>brid | -21.<br>56 | 158 | 1117 | 1138 | -26.6 | 0.568<br>953 | 1114 | 1139 | NM_<br>0288<br>78.3 | Slc6<br>a19               | m<br>RN<br>A | chr13:73<br>679745-<br>7369290<br>5   | - | mmu<br>:743<br>38  | Sodium-de<br>pendent<br>neutral<br>amino acid<br>transporter<br>B(0)AT1                           |
| mmu<br>-miR<br>-10a<br>-5p | Cdk<br>7                  | Miran<br>da_R<br>NAhy<br>brid | -23.<br>98 | 176 | 1901 | 1923 | -26.9 | 0.921<br>474 | 1901 | 1923 | NM_<br>0098<br>74.3 | Cdk<br>7                  | m<br>RN<br>A | chr13:10<br>0697024<br>-100730<br>942 | - | mmu<br>:125<br>72  | Cyclin-depe<br>ndent<br>kinase 7<br>(Homolog<br>of Xenopus<br>MO15<br>cdk-activati<br>ng kinase), |



|                            |             |                               |            |     |      |      |       |              |      |      |                     |             |              |                                |   |                   |                                                                                               |
|----------------------------|-------------|-------------------------------|------------|-----|------|------|-------|--------------|------|------|---------------------|-------------|--------------|--------------------------------|---|-------------------|-----------------------------------------------------------------------------------------------|
|                            |             |                               |            |     |      |      |       |              |      |      |                     |             |              |                                |   |                   | isoform<br>CRA_a                                                                              |
| mmu<br>-miR<br>-10a<br>-5p | Zfp2<br>6   | Miran<br>da_R<br>NAhy<br>brid | -23.<br>92 | 164 | 5000 | 5022 | -28.4 | 0.821<br>215 | 4999 | 5023 | NM_<br>0117<br>53.3 | Zfp2<br>6   | m<br>RN<br>A | chr9:204<br>33181-2<br>0460169 | - | mmu<br>:226<br>88 | Zinc finger<br>protein 26                                                                     |
| mmu<br>-miR<br>-10a<br>-5p | Eep<br>d1   | Miran<br>da_R<br>NAhy<br>brid | -23.<br>35 | 157 | 41   | 63   | -26   | 0.192<br>268 | 34   | 64   | NM_<br>0261<br>89.3 | Eep<br>d1   | m<br>RN<br>A | chr9:254<br>81524-2<br>5489939 | + | mmu<br>:674<br>84 | Endonucleas<br>e/exonuclea<br>se/phosphat<br>ase family<br>domain-con<br>taining<br>protein 1 |
| mmu<br>-miR<br>-10a<br>-5p | Kcnj<br>5   | Miran<br>da_R<br>NAhy<br>brid | -22.<br>38 | 153 | 539  | 560  | -27.9 | 0.530<br>774 | 1889 | 1913 | NM_<br>0106<br>05.4 | Kcnj<br>5   | m<br>RN<br>A | chr9:323<br>14706-3<br>2344380 | - | mmu<br>:165<br>21 | Potassium<br>inwardly-rec<br>tifying<br>channel<br>subfamily J<br>member 5                    |
| mmu<br>-miR<br>-10a<br>-5p | Tmp<br>rss5 | Miran<br>da_R<br>NAhy<br>brid | -27.<br>34 | 161 | 478  | 500  | -30   | 0.036<br>427 | 482  | 501  | NM_<br>0307<br>09.2 | Tmp<br>rss5 | m<br>RN<br>A | chr9:490<br>80719-4<br>9117591 | + | mmu<br>:808<br>93 | Transmemb<br>rane<br>protease,<br>serine 5<br>(Spinesin)                                      |

|                            |            |                               |            |     |      |      |       |              |      |      |                            |            |              |                                      |   |                           |                                              |
|----------------------------|------------|-------------------------------|------------|-----|------|------|-------|--------------|------|------|----------------------------|------------|--------------|--------------------------------------|---|---------------------------|----------------------------------------------|
| mmu<br>-miR<br>-10a<br>-5p | Prtg       | Miran<br>da_R<br>NAhy<br>brid | -21.<br>67 | 151 | 1785 | 1807 | -26.3 | 0.923<br>548 | 1781 | 1808 | NM_<br>1754<br>85.4        | Prtg       | m<br>RN<br>A | chr9:728<br>07274-7<br>2917307       | + | mmu<br>:235<br>472        | Protogenin                                   |
| mmu<br>-miR<br>-10a<br>-5p | Tfdp<br>2  | Miran<br>da_R<br>NAhy<br>brid | -22.<br>26 | 155 | 4878 | 4900 | -25.2 | 0.988<br>859 | 4877 | 4901 | NM_<br>1786<br>67.4        | Tfdp<br>2  | m<br>RN<br>A | chr9:961<br>96246-9<br>6323646       | + | mmu<br>:211<br>586        | Transcriptio<br>n factor<br>Dp-2             |
| mmu<br>-miR<br>-10a<br>-5p | Twf2       | Miran<br>da_R<br>NAhy<br>brid | -27.<br>24 | 157 | 23   | 44   | -27.2 | 0.076<br>524 | 25   | 44   | NM_<br>0118<br>76.3        | Twf2       | m<br>RN<br>A | chr9:106<br>203108-<br>1062153<br>87 | + | mmu<br>:239<br>99         | Twinfilin-2                                  |
| mmu<br>-miR<br>-10a<br>-5p | Tmp<br>pe  | Miran<br>da_R<br>NAhy<br>brid | -20.<br>79 | 151 | 3579 | 3599 | -28.4 | 0.679<br>376 | 243  | 271  | NM_<br>0012<br>0000<br>2.1 | Tmp<br>pe  | m<br>RN<br>A | chr9:114<br>401095-<br>1144112<br>01 | + | mmu<br>:100<br>5047<br>15 | Protein<br>Tmpepe                            |
| mmu<br>-miR<br>-10a<br>-5p | Rbm<br>s3  | Miran<br>da_R<br>NAhy<br>brid | -21.<br>86 | 163 | 3789 | 3812 | -26.5 | 0.937<br>595 | 3791 | 3812 | NM_<br>1786<br>60.4        | Rbm<br>s3  | m<br>RN<br>A | chr9:116<br>572750-<br>1180403<br>55 | - | mmu<br>:207<br>181        | Rbms3<br>protein                             |
| mmu<br>-miR<br>-10a<br>-5p | Ctds<br>pl | Miran<br>da_R<br>NAhy<br>brid | -21.<br>91 | 153 | 94   | 116  | -27.2 | 0.710<br>993 | 2657 | 2689 | NM_<br>1337<br>10.3        | Ctds<br>pl | m<br>RN<br>A | chr9:118<br>929872-<br>1190441<br>19 | + | mmu<br>:692<br>74         | CTD small<br>phosphatas<br>e-like<br>protein |
| mmu<br>-miR                | Atl3       | Miran<br>da_R                 | -23.<br>35 | 154 | 1794 | 1816 | -25.3 | 0.971<br>8   | 1795 | 1816 | NM_<br>1460                | Atl3       | m<br>RN      | chr19:74<br>94040-7                  | + | mmu<br>:109               | Atlantin-3                                   |

|                            |              |                               |            |     |      |      |       |              |      |      |                     |              |              |                                     |   |                    |                                                      |
|----------------------------|--------------|-------------------------------|------------|-----|------|------|-------|--------------|------|------|---------------------|--------------|--------------|-------------------------------------|---|--------------------|------------------------------------------------------|
| -10a<br>-5p                |              | NAhy<br>brid                  |            |     |      |      |       |              |      |      | 91.4                |              | A            | 538609                              |   | 168                |                                                      |
| mmu<br>-miR<br>-10a<br>-5p | Syt7         | Miran<br>da_R<br>NAhy<br>brid | -25.<br>78 | 158 | 2246 | 2269 | -27.5 | 0.775<br>259 | 2246 | 2270 | NM_<br>1730<br>68.2 | Syt7         | m<br>RN<br>A | chr19:10<br>389090-<br>1045318<br>1 | + | mmu<br>:545<br>25  | Synaptotag<br>min-7                                  |
| mmu<br>-miR<br>-10a<br>-5p | Prpf<br>19   | Miran<br>da_R<br>NAhy<br>brid | -21.<br>65 | 150 | 2073 | 2093 | -26.8 | 0.845<br>199 | 2070 | 2094 | NM_<br>1341<br>29.4 | Prpf<br>19   | m<br>RN<br>A | chr19:10<br>898645-<br>1090955<br>9 | + | mmu<br>:280<br>00  | Pre-mRNA-<br>processing<br>factor 19                 |
| mmu<br>-miR<br>-10a<br>-5p | Abli<br>m1   | Miran<br>da_R<br>NAhy<br>brid | -32.<br>3  | 179 | 3682 | 3707 | -34   | 0.079<br>7   | 3682 | 3707 | NM_<br>1786<br>88.3 | Abli<br>m1   | m<br>RN<br>A | chr19:57<br>033264-<br>5721603<br>2 | - | mmu<br>:226<br>251 | Ablim1<br>protein                                    |
| mmu<br>-miR<br>-10a<br>-5p | Mya<br>dm    | Miran<br>da_R<br>NAhy<br>brid | -23.<br>77 | 158 | 1365 | 1386 | -27.9 | 0.334<br>279 | 1361 | 1387 | NM_<br>0169<br>69.2 | Mya<br>dm    | m<br>RN<br>A | chr7:329<br>2953-32<br>99355        | + | mmu<br>:509<br>18  | Myeloid-ass<br>ociated<br>differentiati<br>on marker |
| mmu<br>-miR<br>-10a<br>-5p | Arhg<br>ap35 | Miran<br>da_R<br>NAhy<br>brid | -26.<br>33 | 164 | 2238 | 2261 | -26.7 | 0.754<br>374 | 2239 | 2262 | NM_<br>1727<br>39.4 | Arhg<br>ap35 | m<br>RN<br>A | chr7:164<br>94473-1<br>6614993      | - | mmu<br>:232<br>906 | Rho<br>GTPase-acti<br>vating<br>protein 35           |
| mmu<br>-miR<br>-10a<br>-5p | Smg<br>9     | Miran<br>da_R<br>NAhy<br>brid | -24.<br>67 | 156 | 166  | 192  | -26   | 0.141<br>912 | 167  | 193  | NM_<br>0280<br>47.2 | Smg<br>9     | m<br>RN<br>A | chr7:243<br>99926-2<br>4422777      | + | mmu<br>:719<br>97  | Protein<br>SMG9                                      |

|                            |            |                               |            |     |      |      |       |              |      |      |                            |            |              |                                |   |                    |                                                              |
|----------------------------|------------|-------------------------------|------------|-----|------|------|-------|--------------|------|------|----------------------------|------------|--------------|--------------------------------|---|--------------------|--------------------------------------------------------------|
| mmu<br>-miR<br>-10a<br>-5p | Zfp2<br>7  | Miran<br>da_R<br>NAhy<br>brid | -22.<br>09 | 166 | 564  | 586  | -26.4 | 0.260<br>467 | 553  | 587  | NM_<br>0117<br>54.2        | Zfp2<br>7  | m<br>RN<br>A | chr7:298<br>93337-2<br>9906532 | - | mmu<br>:226<br>89  | Mszf76                                                       |
| mmu<br>-miR<br>-10a<br>-5p | Tyro<br>bp | Miran<br>da_R<br>NAhy<br>brid | -20.<br>2  | 172 | 91   | 113  | -27.1 | 0.020<br>515 | 90   | 114  | NM_<br>0116<br>62.2        | Tyro<br>bp | m<br>RN<br>A | chr7:304<br>13788-3<br>0417582 | + | mmu<br>:221<br>77  | TYRO<br>protein<br>tyrosine<br>kinase-bindi<br>ng protein    |
| mmu<br>-miR<br>-10a<br>-5p | Rhp<br>n2  | Miran<br>da_R<br>NAhy<br>brid | -21.<br>61 | 166 | 844  | 865  | -28.9 | 0.167<br>764 | 835  | 866  | NM_<br>0278<br>97.4        | Rhp<br>n2  | m<br>RN<br>A | chr7:353<br>34237-3<br>5392287 | + | mmu<br>:524<br>28  | Rhpn2<br>protein                                             |
| mmu<br>-miR<br>-10a<br>-5p | Chrn<br>a7 | Miran<br>da_R<br>NAhy<br>brid | -25.<br>07 | 156 | 234  | 260  | -26.8 | 0.143<br>23  | 236  | 261  | NM_<br>0073<br>90.3        | Chrn<br>a7 | m<br>RN<br>A | chr7:630<br>98692-6<br>3212526 | - | mmu<br>:114<br>41  | Neuronal<br>acetylcholin<br>e receptor<br>subunit<br>alpha-7 |
| mmu<br>-miR<br>-10a<br>-5p | Chd<br>2   | Miran<br>da_R<br>NAhy<br>brid | -20.<br>12 | 154 | 418  | 439  | -29.8 | 0.298<br>041 | 1472 | 1495 | NM_<br>0010<br>8134<br>5.2 | Chd<br>2   | m<br>RN<br>A | chr7:734<br>26652-7<br>3541746 | - | mmu<br>:244<br>059 | Chromodo<br>main-helica<br>se-DNA-bin<br>ding protein<br>2   |
| mmu<br>-miR<br>-10a        | Crtc<br>3  | Miran<br>da_R<br>NAhy         | -20.<br>99 | 153 | 2251 | 2273 | -25.2 | 0.926<br>077 | 1699 | 1721 | NM_<br>1738<br>63.2        | Crtc<br>3  | m<br>RN<br>A | chr7:805<br>86627-8<br>0688942 | - | mmu<br>:704<br>61  | CREB-regul<br>ated<br>transcription                          |

|                            |             |                               |            |     |      |      |       |              |      |      |                            |             |              |                                      |   |                    |                                                            |
|----------------------------|-------------|-------------------------------|------------|-----|------|------|-------|--------------|------|------|----------------------------|-------------|--------------|--------------------------------------|---|--------------------|------------------------------------------------------------|
| -5p                        |             | brid                          |            |     |      |      |       |              |      |      |                            |             |              |                                      |   |                    | coactivator<br>3                                           |
| mmu<br>-miR<br>-10a<br>-5p | Olfr6<br>58 | Miran<br>da_R<br>NAhy<br>brid | -21.<br>88 | 157 | 1135 | 1157 | -25.3 | 0.696<br>116 | 1132 | 1158 | NM_<br>1470<br>49.4        | Olfr6<br>58 | m<br>RN<br>A | chr7:104<br>642880-<br>1046473<br>05 | - | mmu<br>:259<br>051 | Olfactory<br>receptor                                      |
| mmu<br>-miR<br>-10a<br>-5p | lqck        | Miran<br>da_R<br>NAhy<br>brid | -21.<br>23 | 153 | 454  | 474  | -26.2 | 0.824<br>508 | 453  | 474  | NM_<br>0010<br>8144<br>6.1 | lqck        | m<br>RN<br>A | chr7:118<br>855753-<br>1189155<br>74 | + | mmu<br>:434<br>232 | Protein lqck                                               |
| mmu<br>-miR<br>-10a<br>-5p | Ano<br>1    | Miran<br>da_R<br>NAhy<br>brid | -20.<br>54 | 159 | 240  | 262  | -27.2 | 0.377<br>973 | 237  | 263  | NM_<br>1786<br>42.5        | Ano<br>1    | m<br>RN<br>A | chr7:144<br>588549-<br>1447520<br>45 | - | mmu<br>:101<br>772 | Anoctamin-<br>1                                            |
| mmu<br>-miR<br>-10a<br>-5p | Rpl3<br>1   | Miran<br>da_R<br>NAhy<br>brid | -30.<br>23 | 177 | 75   | 97   | -33.2 | 0.007<br>008 | 80   | 98   | NM_<br>0532<br>57.3        | Rpl3<br>1   | m<br>RN<br>A | chr1:393<br>67851-3<br>9371911       | + | mmu<br>:114<br>641 | MCG126194<br>, isoform<br>CRA_b                            |
| mmu<br>-miR<br>-10a<br>-5p | Mars<br>2   | Miran<br>da_R<br>NAhy<br>brid | -27.<br>93 | 168 | 980  | 1003 | -27.2 | 0.275<br>374 | 981  | 1004 | NM_<br>1754<br>39.3        | Mars<br>2   | m<br>RN<br>A | chr1:552<br>37177-5<br>5240058       | + | mmu<br>:212<br>679 | Methionine-<br>tRNA<br>synthetase 2<br>(Mitochondr<br>ial) |
| mmu<br>-miR<br>-10a        | Aox<br>2    | Miran<br>da_R<br>NAhy         | -21.<br>37 | 153 | 299  | 321  | -26.9 | 0.190<br>926 | 291  | 322  | NM_<br>0010<br>0841        | Aox<br>2    | m<br>RN<br>A | chr1:582<br>78326-5<br>8379264       | + | mmu<br>:213<br>043 | Aldehyde<br>oxidase 2                                      |

|                            |               |                               |            |     |      |      |       |              |      |      |                     |               |              |                                      |   |                    |                                                                         |
|----------------------------|---------------|-------------------------------|------------|-----|------|------|-------|--------------|------|------|---------------------|---------------|--------------|--------------------------------------|---|--------------------|-------------------------------------------------------------------------|
| -5p                        |               | brid                          |            |     |      |      |       |              |      |      | 9.2                 |               |              |                                      |   |                    |                                                                         |
| mmu<br>-miR<br>-10a<br>-5p | Tns1          | Miran<br>da_R<br>NAhy<br>brid | -21.<br>47 | 153 | 669  | 689  | -25.3 | 0.965<br>733 | 664  | 690  | NM_<br>1771<br>69.2 | Tns1          | m<br>RN<br>A | chr1:739<br>10232-7<br>4098332       | - | mmu<br>:219<br>61  | Protein Tns1                                                            |
| mmu<br>-miR<br>-10a<br>-5p | Cnot<br>9     | Miran<br>da_R<br>NAhy<br>brid | -21.<br>73 | 156 | 1111 | 1133 | -25.1 | 0.823<br>993 | 1099 | 1133 |                     |               |              |                                      |   |                    |                                                                         |
| mmu<br>-miR<br>-10a<br>-5p | Hda<br>c4     | Miran<br>da_R<br>NAhy<br>brid | -25.<br>32 | 168 | 2303 | 2329 | -29.1 | 0.525<br>638 | 2305 | 2330 | NM_<br>2072<br>25.1 | Hda<br>c4     | m<br>RN<br>A | chr1:919<br>28779-9<br>2180231       | - | mmu<br>:208<br>727 | Histone<br>deacetylase<br>4                                             |
| mmu<br>-miR<br>-10a<br>-5p | Tnfrs<br>f11a | Miran<br>da_R<br>NAhy<br>brid | -22.<br>07 | 168 | 1560 | 1583 | -26   | 0.843<br>111 | 1557 | 1583 | NM_<br>0093<br>99.3 | Tnfrs<br>f11a | m<br>RN<br>A | chr1:105<br>780747-<br>1058457<br>98 | + | mmu<br>:219<br>34  | Tumor<br>necrosis<br>factor<br>receptor<br>superfamily<br>member<br>11A |
| mmu<br>-miR<br>-10a<br>-5p | Ptpn<br>4     | Miran<br>da_R<br>NAhy<br>brid | -21.<br>08 | 158 | 6627 | 6649 | -25.4 | 0.994<br>37  | 6624 | 6650 | NM_<br>0199<br>33.2 | Ptpn<br>4     | m<br>RN<br>A | chr1:119<br>652467-<br>1198374<br>57 | - | mmu<br>:192<br>58  | Tyrosine-pr<br>otein<br>phosphatas<br>e<br>non-recept                   |

|                            |            |                               |            |     |      |      |       |              |      |      |                            |            |              |                                      |   |                    |                                                         |
|----------------------------|------------|-------------------------------|------------|-----|------|------|-------|--------------|------|------|----------------------------|------------|--------------|--------------------------------------|---|--------------------|---------------------------------------------------------|
|                            |            |                               |            |     |      |      |       |              |      |      |                            |            |              |                                      |   |                    | or type 4                                               |
| mmu<br>-miR<br>-10a<br>-5p | Pou<br>2f1 | Miran<br>da_R<br>NAhy<br>brid | -21.<br>11 | 153 | 25   | 47   | -26.4 | 0.991<br>216 | 22   | 48   | NM_<br>1989<br>34.3        | Pou<br>2f1 | m<br>RN<br>A | chr1:165<br>865150-<br>1659530<br>71 | - | mmu<br>:189<br>86  | POU<br>domain,<br>class 2,<br>transcription<br>factor 1 |
| mmu<br>-miR<br>-10a<br>-5p | Hnrn<br>pu | Miran<br>da_R<br>NAhy<br>brid | -20.<br>6  | 161 | 2916 | 2937 | -26.7 | 0.961<br>819 | 7717 | 7741 | NM_<br>0168<br>05.2        | Hnrn<br>pu | m<br>RN<br>A | chr1:178<br>321108-<br>1783378<br>10 | - | mmu<br>:518<br>10  | Protein<br>Gm28062                                      |
| mmu<br>-miR<br>-10a<br>-5p | Grm<br>3   | Miran<br>da_R<br>NAhy<br>brid | -22.<br>2  | 157 | 262  | 285  | -27.3 | 0.113<br>12  | 258  | 285  | NM_<br>1818<br>50.2        | Grm<br>3   | m<br>RN<br>A | chr5:948<br>5236-97<br>25352         | - | mmu<br>:108<br>069 | Grm3<br>protein                                         |
| mmu<br>-miR<br>-10a<br>-5p | Htr5<br>a  | Miran<br>da_R<br>NAhy<br>brid | -22.<br>92 | 166 | 1447 | 1469 | -26.9 | 0.802<br>53  | 1443 | 1469 | NM_<br>0083<br>14.2        | Htr5<br>a  | m<br>RN<br>A | chr5:278<br>41702-2<br>7853143       | + | mmu<br>:155<br>63  | 5-hydroxytr<br>yptamine<br>receptor 5A                  |
| mmu<br>-miR<br>-10a<br>-5p | Nat8<br>l  | Miran<br>da_R<br>NAhy<br>brid | -20.<br>78 | 160 | 143  | 166  | -25.6 | 0.962<br>235 | 143  | 166  | NM_<br>0010<br>0198<br>5.3 | Nat8<br>l  | m<br>RN<br>A | chr5:339<br>95984-3<br>4005916       | + | mmu<br>:269<br>642 | N-acetylasp<br>artate<br>synthetase                     |
| mmu<br>-miR                | Golg<br>a3 | Miran<br>da_R                 | -21.<br>56 | 155 | 1187 | 1214 | -27   | 0.732<br>723 | 1187 | 1214 | NM_<br>0081                | Golg<br>a3 | m<br>RN      | chr5:110<br>176658-                  | + | mmu<br>:269        | Golgin<br>subfamily A                                   |

|                            |             |                               |            |     |      |      |       |              |      |      |                     |              |              |                                      |   |                    |                                                                                                |
|----------------------------|-------------|-------------------------------|------------|-----|------|------|-------|--------------|------|------|---------------------|--------------|--------------|--------------------------------------|---|--------------------|------------------------------------------------------------------------------------------------|
| -10a<br>-5p                |             | NAhy<br>brid                  |            |     |      |      |       |              |      |      | 46.3                |              | A            | 1102264<br>70                        |   | 682                | member 3                                                                                       |
| mmu<br>-miR<br>-10a<br>-5p | Ddx<br>51   | Miran<br>da_R<br>NAhy<br>brid | -21.<br>63 | 168 | 1988 | 2013 | -25.7 | 0.858<br>299 | 1989 | 2014 | NM_<br>0271<br>56.3 | Ddx<br>51    | m<br>RN<br>A | chr5:110<br>653451-<br>1106604<br>96 | + | mmu<br>:696<br>63  | ATP-depen<br>dent RNA<br>helicase<br>DDX51                                                     |
| mmu<br>-miR<br>-10a<br>-5p | Slc8<br>b1  | Miran<br>da_R<br>NAhy<br>brid | -20.<br>86 | 161 | 336  | 358  | -25.7 | 0.443<br>352 | 324  | 359  | NM_<br>1332<br>21.2 | Slc8<br>b1   | m<br>RN<br>A | chr5:120<br>511168-<br>1205278<br>14 | + | mmu<br>:170<br>756 | Sodium/pot<br>assium/calci<br>um<br>exchanger<br>6,<br>mitochondrial                           |
| mmu<br>-miR<br>-10a<br>-5p | Pvrig       | Miran<br>da_R<br>NAhy<br>brid | -22.<br>8  | 163 | 1457 | 1482 | -27.2 | 0.815<br>313 | 1462 | 1483 | Pvrig<br>-ps        | Pvrig<br>-ps | m<br>RN<br>A | chr5:138<br>341770-<br>1383598<br>00 | + |                    | poliovirus<br>receptor<br>related<br>immunoglo<br>bulin<br>domain<br>containing,<br>pseudogene |
| mmu<br>-miR<br>-10a<br>-5p | Katn<br>al1 | Miran<br>da_R<br>NAhy<br>brid | -25.<br>36 | 168 | 863  | 886  | -26.9 | 0.841<br>1   | 852  | 887  | NM_<br>1535<br>72.2 | Katn<br>al1  | m<br>RN<br>A | chr5:148<br>871584-<br>1489287<br>37 | - | mmu<br>:231<br>912 | Katanin p60<br>ATPase-con<br>taining<br>subunit<br>A-like 1                                    |



|                            |              |                               |            |     |      |      |       |              |      |      |                     |              |              |                                       |   |                    |                                                            |
|----------------------------|--------------|-------------------------------|------------|-----|------|------|-------|--------------|------|------|---------------------|--------------|--------------|---------------------------------------|---|--------------------|------------------------------------------------------------|
| mmu<br>-miR<br>-10a<br>-5p | Myt<br>1l    | Miran<br>da_R<br>NAhy<br>brid | -23.<br>34 | 165 | 1617 | 1639 | -27.3 | 0.604<br>913 | 1617 | 1639 | NM_<br>0086<br>66.3 | Myt<br>1l    | m<br>RN<br>A | chr12:29<br>533358-<br>2992321<br>6   | + | mmu<br>:179<br>33  | Myelin<br>transcription<br>factor 1-like<br>protein        |
| mmu<br>-miR<br>-10a<br>-5p | lft43        | Miran<br>da_R<br>NAhy<br>brid | -23.<br>28 | 151 | 1000 | 1022 | -26.9 | 0.792<br>936 | 1001 | 1023 | NM_<br>0296<br>01.3 | lft43        | m<br>RN<br>A | chr12:86<br>082561-<br>8616245<br>9   | + | mmu<br>:764<br>11  | Intraflagellar<br>transport<br>protein 43<br>homolog       |
| mmu<br>-miR<br>-10a<br>-5p | Gpat<br>ch2l | Miran<br>da_R<br>NAhy<br>brid | -22.<br>07 | 154 | 2079 | 2103 | -25.9 | 0.966<br>385 | 2078 | 2103 | NM_<br>0274<br>05.2 | Gpat<br>ch2l | m<br>RN<br>A | chr12:86<br>241838-<br>8629179<br>3   | + | mmu<br>:703<br>73  | Putative<br>uncharacteri<br>zed protein                    |
| mmu<br>-miR<br>-10a<br>-5p | Bdkr<br>b1   | Miran<br>da_R<br>NAhy<br>brid | -24.<br>13 | 152 | 177  | 198  | -30.8 | 0.005<br>117 | 174  | 199  | NM_<br>0075<br>39.2 | Bdkr<br>b1   | m<br>RN<br>A | chr12:10<br>5604091<br>-105605<br>428 | + | mmu<br>:120<br>61  | MCG1159                                                    |
| mmu<br>-miR<br>-10a<br>-5p | Rcor<br>1    | Miran<br>da_R<br>NAhy<br>brid | -21.<br>66 | 151 | 2002 | 2024 | -27.4 | 0.730<br>884 | 1998 | 2025 | NM_<br>1980<br>23.2 | Rcor<br>1    | m<br>RN<br>A | chr12:11<br>1039798<br>-111113<br>389 | + | mmu<br>:217<br>864 | REST<br>corepressor<br>1                                   |
| mmu<br>-miR<br>-10a<br>-5p | Zfp3<br>86   | Miran<br>da_R<br>NAhy<br>brid | -23.<br>99 | 155 | 2330 | 2352 | -26.2 | 0.768<br>888 | 2329 | 2353 | NM_<br>0195<br>65.4 | Zfp3<br>86   | m<br>RN<br>A | chr12:11<br>6047724<br>-116063<br>209 | + | mmu<br>:562<br>20  | Zinc finger<br>protein 386<br>(Kruppel-lik<br>e) isoform a |
| mmu<br>-miR                | Hic2         | Miran<br>da_R                 | -22.<br>44 | 156 | 322  | 347  | -25.6 | 0.948<br>006 | 322  | 347  | NM_<br>1789         | Hic2         | m<br>RN      | chr16:17<br>233587-                   | + | mmu<br>:581        | Hypermethy<br>lated in                                     |

|                            |                 |                               |            |     |      |      |       |              |      |      |                     |                 |                     |                                     |   |                    |                                                                       |
|----------------------------|-----------------|-------------------------------|------------|-----|------|------|-------|--------------|------|------|---------------------|-----------------|---------------------|-------------------------------------|---|--------------------|-----------------------------------------------------------------------|
| -10a<br>-5p                |                 | NAhy<br>brid                  |            |     |      |      |       |              |      |      | 22.3                |                 | A                   | 1726343<br>0                        |   | 80                 | cancer 2<br>protein                                                   |
| mmu<br>-miR<br>-10a<br>-5p | Crkl            | Miran<br>da_R<br>NAhy<br>brid | -22.<br>69 | 160 | 2841 | 2864 | -26.6 | 0.813<br>342 | 2839 | 2865 | NM_<br>0077<br>64.5 | Crkl            | m<br>RN<br>A        | chr16:17<br>451985-<br>1748744<br>0 | + | mmu<br>:129<br>29  | V-crk<br>sarcoma<br>virus CT10<br>oncogene<br>homolog<br>(Avian)-like |
| mmu<br>-miR<br>-10a<br>-5p | Senp<br>5       | Miran<br>da_R<br>NAhy<br>brid | -22.<br>45 | 150 | 2005 | 2026 | -25.3 | 0.949<br>225 | 2005 | 2026 | NM_<br>1771<br>03.4 | Senp<br>5       | m<br>RN<br>A        | chr16:31<br>961906-<br>3201074<br>4 | - | mmu<br>:320<br>213 | Sentrin-spe<br>cific<br>protease 5                                    |
| mmu<br>-miR<br>-10a<br>-5p | Hsp<br>bap<br>1 | Miran<br>da_R<br>NAhy<br>brid | -21.<br>53 | 168 | 881  | 903  | -25.8 | 0.862<br>532 | 883  | 903  | NM_<br>1751<br>11.3 | Hsp<br>bap<br>1 | mi<br>sc<br>RN<br>A | chr16:35<br>769655-<br>3582650<br>4 | + | mmu<br>:666<br>67  | HSPB1-asso<br>ciated<br>protein 1                                     |
| mmu<br>-miR<br>-10a<br>-5p | Gtf2<br>e1      | Miran<br>da_R<br>NAhy<br>brid | -23.<br>09 | 155 | 1200 | 1224 | -25.8 | 0.632<br>564 | 1202 | 1225 | NM_<br>0288<br>12.3 | Gtf2<br>e1      | m<br>RN<br>A        | chr16:37<br>509796-<br>3753976<br>9 | - | mmu<br>:741<br>97  | Putative<br>uncharact<br>erized protein                               |
| mmu<br>-miR<br>-10a<br>-5p | ltsn1           | Miran<br>da_R<br>NAhy<br>brid | -25.<br>79 | 155 | 607  | 630  | -28.7 | 0.802<br>109 | 605  | 631  | NM_<br>0105<br>87.2 | ltsn1           | m<br>RN<br>A        | chr16:91<br>803274-<br>9192059<br>1 | + | mmu<br>:164<br>43  | MAA-13<br>protein                                                     |
| mmu<br>-miR                | Atp8<br>a2      | Miran<br>da_R                 | -21.<br>28 | 168 | 1486 | 1510 | -25.4 | 0.736<br>295 | 1487 | 1511 | NM_<br>0158         | Atp8<br>a2      | m<br>RN             | chr14:59<br>647741-                 | - | mmu<br>:507        | Phospholipi<br>d-transporti                                           |

|                            |                   |                               |            |     |      |      |       |              |      |      |                            |                   |              |                                     |   |                    |                                                    |
|----------------------------|-------------------|-------------------------------|------------|-----|------|------|-------|--------------|------|------|----------------------------|-------------------|--------------|-------------------------------------|---|--------------------|----------------------------------------------------|
| -10a<br>-5p                |                   | NAhy<br>brid                  |            |     |      |      |       |              |      |      | 03.2                       |                   | A            | 6008683<br>4                        |   | 69                 | ng ATPase<br>IB                                    |
| mmu<br>-miR<br>-10a<br>-5p | Jmjd<br>8         | Miran<br>da_R<br>NAhy<br>brid | -23.<br>42 | 159 | 384  | 405  | -26.4 | 0.438<br>114 | 381  | 405  | NM_<br>0281<br>01.4        | Jmjd<br>8         | m<br>RN<br>A | chr17:25<br>829043-<br>2583184<br>3 | + | mmu<br>:721<br>06  | JmjC<br>domain-con<br>taining<br>protein 8         |
| mmu<br>-miR<br>-10a<br>-5p | D17<br>Wsu<br>92e | Miran<br>da_R<br>NAhy<br>brid | -23.<br>87 | 159 | 1234 | 1259 | -26.1 | 0.788<br>438 | 1236 | 1259 | NM_<br>0012<br>7151<br>1.1 | D17<br>Wsu<br>92e | m<br>RN<br>A | chr17:27<br>751232-<br>2782054<br>2 | - | mmu<br>:224<br>647 | Uncharacte<br>rized protein<br>C6orf106<br>homolog |
| mmu<br>-miR<br>-10a<br>-5p | Zfp8<br>71        | Miran<br>da_R<br>NAhy<br>brid | -23.<br>21 | 154 | 8698 | 8720 | -25.9 | 0.992<br>993 | 8702 | 8720 | NM_<br>1724<br>58.3        | Zfp8<br>71        | m<br>RN<br>A | chr17:32<br>765496-<br>3278828<br>7 | - | mmu<br>:208<br>292 | Protein<br>Zfp871                                  |
| mmu<br>-miR<br>-10a<br>-5p | Zfp7<br>99        | Miran<br>da_R<br>NAhy<br>brid | -23.<br>43 | 155 | 2478 | 2506 | -26.7 | 0.820<br>563 | 2478 | 2507 | NM_<br>1773<br>59.5        | Zfp7<br>99        | m<br>RN<br>A | chr17:32<br>815449-<br>3283026<br>1 | - | mmu<br>:240<br>064 | Protein<br>Zfp799                                  |
| mmu<br>-miR<br>-10a<br>-5p | Zfp8<br>70        | Miran<br>da_R<br>NAhy<br>brid | -24.<br>45 | 150 | 2085 | 2105 | -27.5 | 0.662<br>876 | 2085 | 2105 | NM_<br>2072<br>45.2        | Zfp8<br>70        | m<br>RN<br>A | chr17:32<br>879221-<br>3289143<br>3 | - | mmu<br>:240<br>066 | Protein<br>Zfp870                                  |
| mmu<br>-miR<br>-10a<br>-5p | C4b               | Miran<br>da_R<br>NAhy<br>brid | -23.<br>72 | 168 | 55   | 77   | -27   | 0.008<br>255 | 46   | 78   | NM_<br>0097<br>80.2        | C4b               | m<br>RN<br>A | chr17:34<br>728380-<br>3474389<br>7 | - | mmu<br>:122<br>68  | Complemen<br>t<br>component<br>4B (Childo          |

|                            |           |                               |            |     |      |      |       |              |      |      |                     |           |              |                                     |   |                    |                                                                     |
|----------------------------|-----------|-------------------------------|------------|-----|------|------|-------|--------------|------|------|---------------------|-----------|--------------|-------------------------------------|---|--------------------|---------------------------------------------------------------------|
|                            |           |                               |            |     |      |      |       |              |      |      |                     |           |              |                                     |   |                    | blood group)                                                        |
| mmu<br>-miR<br>-10a<br>-5p | C4a       | Miran<br>da_R<br>NAhy<br>brid | -22.<br>5  | 164 | 55   | 77   | -26.5 | 0.010<br>902 | 48   | 78   | NM_<br>0114<br>13.2 | C4a       | m<br>RN<br>A | chr17:34<br>809092-<br>3482345<br>4 | - | mmu<br>:625<br>018 | C4a protein                                                         |
| mmu<br>-miR<br>-10a<br>-5p | Nfya      | Miran<br>da_R<br>NAhy<br>brid | -20.<br>23 | 152 | 2215 | 2237 | -25.8 | 0.788<br>622 | 1247 | 1275 | NM_<br>0109<br>13.2 | Nfya      | m<br>RN<br>A | chr17:48<br>386885-<br>4840990<br>1 | - | mmu<br>:180<br>44  | Nuclear<br>transcription<br>factor Y<br>subunit<br>alpha            |
| mmu<br>-miR<br>-10a<br>-5p | Lbh       | Miran<br>da_R<br>NAhy<br>brid | -30.<br>14 | 156 | 1249 | 1274 | -32.5 | 0.084<br>434 | 1248 | 1275 | NM_<br>0299<br>99.4 | Lbh       | m<br>RN<br>A | chr17:72<br>918305-<br>7294194<br>6 | + | mmu<br>:778<br>89  | Protein LBH                                                         |
| mmu<br>-miR<br>-10a<br>-5p | Kcng<br>3 | Miran<br>da_R<br>NAhy<br>brid | -22.<br>51 | 167 | 3790 | 3812 | -26   | 0.986<br>205 | 3791 | 3812 | NM_<br>1535<br>12.1 | Kcng<br>3 | m<br>RN<br>A | chr17:83<br>579949-<br>8363199<br>3 | - | mmu<br>:225<br>030 | Potassium<br>voltage-gat<br>ed channel<br>subfamily G<br>member 3   |
| mmu<br>-miR<br>-10a<br>-5p | Msr<br>b2 | Miran<br>da_R<br>NAhy<br>brid | -24.<br>74 | 155 | 191  | 219  | -25.9 | 0.260<br>059 | 192  | 220  | NM_<br>0296<br>19.2 | Msr<br>b2 | m<br>RN<br>A | chr2:193<br>71411-1<br>9380814      | + | mmu<br>:764<br>67  | Methionine-<br>R-sulfoxide<br>reductase<br>B2,<br>mitochondri<br>al |

|                            |                          |                               |            |     |      |      |       |              |      |      |                     |             |              |                                      |   |                    |                                                                  |
|----------------------------|--------------------------|-------------------------------|------------|-----|------|------|-------|--------------|------|------|---------------------|-------------|--------------|--------------------------------------|---|--------------------|------------------------------------------------------------------|
| mmu<br>-miR<br>-10a<br>-5p | Gad<br>2                 | Miran<br>da_R<br>NAhy<br>brid | -23.<br>92 | 168 | 3150 | 3173 | -27.1 | 0.732<br>273 | 3150 | 3173 | NM_<br>0080<br>78.2 | Gad<br>2    | m<br>RN<br>A | chr2:226<br>21422-2<br>2656274       | + | mmu<br>:144<br>17  | Glutamate<br>decarboxyla<br>se 2                                 |
| mmu<br>-miR<br>-10a<br>-5p | Zer1                     | Miran<br>da_R<br>NAhy<br>brid | -25.<br>18 | 151 | 58   | 84   | -30.2 | 0.118<br>5   | 52   | 85   | NM_<br>1786<br>94.4 | Zer1        | m<br>RN<br>A | chr2:301<br>06732-3<br>0125258       | - | mmu<br>:227<br>693 | Zyg-11<br>homolog B<br>(C.<br>elegans)-lik<br>e                  |
| mmu<br>-miR<br>-10a<br>-5p | Smt<br>nl1               | Miran<br>da_R<br>NAhy<br>brid | -21.<br>92 | 156 | 792  | 817  | -26.1 | 0.377<br>746 | 790  | 818  | NM_<br>0242<br>30.2 | Smt<br>nl1  | m<br>RN<br>A | chr2:848<br>11176-8<br>4822652       | - | mmu<br>:686<br>78  | Smoothelin-<br>like protein<br>1                                 |
| mmu<br>-miR<br>-10a<br>-5p | Map<br>kbp1              | Miran<br>da_R<br>NAhy<br>brid | -21.<br>64 | 154 | 364  | 386  | -25.2 | 0.823<br>562 | 362  | 387  | NM_<br>0119<br>41.3 | Map<br>kbp1 | m<br>RN<br>A | chr2:119<br>972390-<br>1200274<br>03 | + | mmu<br>:263<br>90  | Mitogen-act<br>ivated<br>protein<br>kinase-bindi<br>ng protein 1 |
| mmu<br>-miR<br>-10a<br>-5p | LOC<br>1081<br>6873<br>4 | Miran<br>da_R<br>NAhy<br>brid | -24.<br>9  | 163 | 371  | 393  | -26.9 | 0.103<br>756 | 373  | 394  |                     |             |              |                                      |   |                    |                                                                  |
| mmu<br>-miR<br>-10a<br>-5p | Dbn<br>dd2               | Miran<br>da_R<br>NAhy<br>brid | -28.<br>63 | 151 | 1734 | 1762 | -30   | 0.274<br>627 | 1733 | 1762 | NM_<br>0267<br>97.2 | Dbn<br>dd2  | m<br>RN<br>A | chr2:164<br>467153-<br>1644933<br>19 | + | mmu<br>:528<br>40  | Dysbindin<br>domain-con<br>taining<br>protein 2                  |

|                            |         |                   |        |     |      |      |       |          |      |      |                |         |      |                         |   |            |                                                                        |
|----------------------------|---------|-------------------|--------|-----|------|------|-------|----------|------|------|----------------|---------|------|-------------------------|---|------------|------------------------------------------------------------------------|
| mmu<br>-miR<br>-10a<br>-5p | Zmat2   | Miranda_RNAhybrid | -20.71 | 155 | 1134 | 1161 | -27.5 | 0.380433 | 1133 | 1161 | NM_025594.3    | Zmat2   | mRNA | chr18:36793923-36799660 | + | mmu:66492  | Zinc finger matrix-type protein 2                                      |
| mmu<br>-miR<br>-10a<br>-5p | Slc25a2 | Miranda_RNAhybrid | -27.92 | 172 | 210  | 232  | -32.3 | 0.003294 | 209  | 233  | NM_001159275.1 | Slc25a2 | mRNA | chr18:37637378-37638723 | - | mmu:83885  | Mutant ornithine transporter 2                                         |
| mmu<br>-miR<br>-10a<br>-5p | Spry4   | Miranda_RNAhybrid | -25.29 | 165 | 247  | 267  | -27.6 | 0.657235 | 247  | 267  | NM_011898.2    | Spry4   | mRNA | chr18:38586265-38601268 | - | mmu:24066  | Protein sprouty homolog 4                                              |
| mmu<br>-miR<br>-10a<br>-5p | Ticam2  | Miranda_RNAhybrid | -20.92 | 160 | 1388 | 1412 | -25.2 | 0.826137 | 1389 | 1412 | NM_173394.3    | Ticam2  | mRNA | chr18:46558231-46574533 | - | mmu:225471 | TIR domain-containing adapter molecule 2                               |
| mmu<br>-miR<br>-10a<br>-5p | Pparg1b | Miranda_RNAhybrid | -23.75 | 154 | 4066 | 4088 | -26.9 | 0.942964 | 4041 | 4089 | NM_133249.2    | Pparg1b | mRNA | chr18:61291445-61401462 | - | mmu:170826 | Peroxisome proliferative activated receptor, gamma, coactivator 1 beta |
| mmu<br>-miR<br>65          | Rnf165  | Miranda_R         | -22.57 | 160 | 3689 | 3712 | -25   | 0.994871 | 2893 | 2916 | NM_0011        | Rnf165  | mRNA | chr18:77456110-         | - | mmu:225    | RING finger protein 165                                                |

|      |  |      |  |  |  |  |  |  |  |      |  |   |         |  |     |  |
|------|--|------|--|--|--|--|--|--|--|------|--|---|---------|--|-----|--|
| -10a |  | NAhy |  |  |  |  |  |  |  | 6450 |  | A | 7756513 |  | 743 |  |
| -5p  |  | brid |  |  |  |  |  |  |  | 4.1  |  |   | 6       |  |     |  |
